1 **Natural and hatchery-derived selection on chum salmon:**  
2 **mechanisms underlying Japanese catch decline in a**  
3 **warming climate**

4  
5  
6 Shuichi Kitada<sup>1\*</sup> and Hirohisa Kishino<sup>2</sup>  
7  
8  
9

10  
11  
12  
13 <sup>1</sup> Tokyo University of Marine Science and Technology, Tokyo 108-8477, Japan.

14 <sup>2</sup> Graduate School of Agriculture and Life Sciences, The University of Tokyo,  
15 Tokyo 113-8657, Japan.

16  
17 Correspondence

18 Email: [kitada@kaiyodai.ac.jp](mailto:kitada@kaiyodai.ac.jp)

19 Although the biomass of chum salmon (*Oncorhynchus keta*) in the North Pacific is  
20 at a historical maximum, the number of individuals returning to Japan, the location  
21 of the world's largest chum salmon hatchery program, has declined substantially  
22 over 25 years. To search for potential causes of this decline, we synthesized  
23 catch/release, sea surface temperature (SST), and published genetic data,  
24 namely, microsatellites, single nucleotide polymorphisms collected for efficient  
25 stock identification, lactate dehydrogenase (LDH) isozymes, and mitochondrial  
26 DNA (mtDNA) from 624 locations in the distribution range ( $n = 78,525$ ). SST in the  
27 summer, when juveniles inhabit Japanese coasts, was found to be negatively  
28 correlated with adult return rates 2-5 years later ( $r = -0.69$ ). Integration of neighbor-  
29 joining phylogenetic trees with genetic diversity data indicated that chum salmon  
30 originated in western Alaska and expanded its distribution southward, while  
31 analysis of microsatellite data suggested the introgression of neutral genomic loci  
32 from Japanese salmon into Russian and Alaskan populations. Hatchery operations  
33 have altered allele frequencies of nine diversifying genes related to reproduction,  
34 immune system function, DNA damage repair, growth and energy metabolism in  
35 Japanese populations. Thermally adapted LDH-A1\*100 alleles, predominantly  
36 expressed in skeletal muscle, have often been replaced by ancestral alleles, while  
37 the ancestral mtDNA-B3 haplotype is significantly rarer in Japanese chum salmon.  
38 This genetic replacement should result in lower metabolic efficiencies in skeletal  
39 muscle and mitochondria at higher temperatures, thereby leading to the lower  
40 athletic performance and survival of juveniles in a warming climate.

41  
42 **Keywords:** lactate dehydrogenase, microsatellite, mtDNA, population structure,  
43 single nucleotide polymorphisms, thermal adaptation

## 44 **1 | INTRODUCTION**

45 Pacific salmon has the longest history of artificial propagation, which started in the middle  
46 of the eighteenth century, and management of these species constitutes the world's largest  
47 set of hatchery enhancement programs (reviewed by Naish et al., 2007). Hatchery release  
48 of chum salmon (*Oncorhynchus keta*) comprises the world's largest marine stock  
49 enhancement and sea-ranching program (Amoroso, Tillotson, & Hilborn, 2017; Kitada,  
50 2018). Canada, South Korea (hereafter, Korea), Russia, the United States and Japan  
51 currently operate Pacific salmon hatcheries in the North Pacific. According to North  
52 Pacific Anadromous Fish Commission statistics (NPAFC, 2020), the total number of chum  
53 salmon released into the North Pacific during six decades (1952–2019) was 137 billion,  
54 which included 90 billion juveniles (66%) released by Japan. Currently, ~60% of chum  
55 salmon are of hatchery origin (Ruggerone & Irvine, 2018). The biomass of chum salmon is  
56 at a historical maximum in the North Pacific, whereas the proportion in Japan has steeply  
57 decreased (Supporting Information Figure S1).

58  
59 Japan runs the world's largest chum salmon hatchery release program (Supporting  
60 Information Supplemental Note). At present, 262 salmon hatcheries operate in Japan.  
61 Releases of chum salmon juveniles from Japan have increased remarkably since the  
62 1970s—to ~1.5 billion in 2018 (Supporting Information Figure S2). Supported by natural  
63 shifts in marine productivity, the number of chum salmon returning to Japan sharply  
64 increased after the 1970s (Beamish, Mahnken, & Neville, 1997). Nevertheless, the mean  
65 body weight of chum salmon returning to Japan during this time significantly decreased,  
66 thus suggesting intra- and inter-species density-dependent effects in the North Pacific  
67 (Ishida, Ito, Kaeriyama, McKinnell, & Nagasawa, 1993; Kaeriyama, 1998; Kitada, 2018).  
68 Despite continuous hatchery releases, the number of returning chum salmon steeply  
69 decreased after 1996, the year when the recorded catch reached a historical maximum of  
70 81 million fish (Supporting Information Figure S2). The 1992 closure of high-sea salmon  
71 fisheries (Morita et al., 2006), which harvested a mixed stock of North American and  
72 Asian chum salmon populations (e.g., Beacham et al., 2009; Myers, Klovach, Gritsenko,  
73 Urawa, & Royer, 2007; Seeb et al., 2011; Urawa et al., 2009; Wilmot et al., 1998), might  
74 have been expected to increase the homing of mature fish to their natal rivers. A marked  
75 increase after the closure of the high-sea salmon fisheries was only observed in Russia,  
76 however, which suggests that the Sea of Okhotsk, an indispensable common feeding  
77 ground for juvenile chum salmon originating in Russia and Japan (Beamish, 2017;  
78 Mayama & Ishida, 2003), has been a favorable environment. This outcome further  
79 suggests that Japanese chum salmon may lose out to Russian chum salmon in the  
80 competition among juveniles for food in the Sea of Okhotsk. An increased abundance of  
81 hatchery fish may cause genetic changes and reduce the resilience of salmon populations to  
82 changes in their habitat induced by a warming climate (Beamish, 2017).

83  
84 Salmonids are genetically the most well-studied non-model organisms (Waples, Naish, &  
85 Primmer, 2020). The genetic effects of hatchery-reared animals on wild populations are a  
86 major concern (e.g., Gharrett & Smoker, 1993; Laikre, Schwartz, Waples, & Ryman, 2010;  
87 Waples, 1991, 1999; Waples & Drake, 2004). Evidence exists that hatchery-reared  
88 salmonids breeding in the wild have been responsible for reduced survival rates  
89 (Reisenbichler & McIntyre, 1977; Reisenbichler & Rubin, 1999) and reproductive success  
90 (Araki, Cooper, & Blouin, 2007, 2009; Christie, Ford, & Blouin, 2014; Fleming et al.,  
91 2000; McGinnity et al., 2003). Genetic adaptation to hatchery environments is also known

92 to occur (Christie, Marine, French, & Blouin, 2012; Christie, Marine, Fox, French, &  
93 Blouin, 2016; Le Luyer et al., 2017). Hatchery environments can favor certain genotypes  
94 associated with domestication when genes from farmed fish are substantially introgressed  
95 into hatchery broodstock (Hagen et al., 2019). In addition, artificial selection in hatcheries  
96 may drive maladaptation to climate change and act in a direction opposite to that of natural  
97 selection (Tillotson, Barnett, Bhuthimethee, Koehler, & Quinn, 2019). Enhanced growth of  
98 salmon juveniles due to the warming climate has enabled earlier migration to the ocean  
99 from freshwater, which can increase competition between wild and hatchery-released  
100 salmon (Cline, Ohlberger, & Schindler, 2019). Almost all chum salmon returning to Japan  
101 are hatchery-released fish—or possibly wild-born hatchery descendants (i.e., no real wild  
102 fish may exist)—and the significant decline in Japanese chum salmon populations may be  
103 due to a fitness decline in populations induced by genetic effects of long-term hatchery  
104 releases over 130 years (Kitada, 2020). Nevertheless, no empirical study has examined  
105 mechanisms of fitness decline in hatchery fish in detail (Araki, Berejikian, Ford, & Blouin,  
106 2008), and the causes of the rapid decline in the catches of Japanese chum salmon  
107 populations are unknown.

108  
109 To search for mechanisms responsible for the catch decline in an evolutionary context, we  
110 synthesized catch/release and SST statistics and published genetic data sets of adult chum  
111 salmon collected from the species' distribution range. We inferred the evolutionary history  
112 and selection of chum salmon by comparing the diversity and gene flow of neutral  
113 microsatellite markers and putatively adaptive SNPs among local populations on western  
114 and eastern sides of the North Pacific. We performed a meta-analysis of combined SNPs,  
115 isozymes and mtDNA allele/haplotype frequencies, which allowed us to look for a  
116 correlation between significant geographical clines in allele frequencies and changes in the  
117 distribution range. By examining allele frequencies with reference to latitude, we were able  
118 to identify genes significantly differentiating Japanese populations from those of other  
119 areas. Our analyses addressed the crucial question of why the biomass of Japanese chum  
120 salmon, which have the highest genetic diversity in the North Pacific, has been declining in  
121 the context of the evolutionary history of this species.

122

## 123 **2 | CHUM SALMON BIOMASS IN THE NORTH PACIFIC**

### 124 **2.1 Changes in catch in the North Pacific and Japan**

125 To begin, we reviewed changes in regional catch statistics in the North Pacific. Chum  
126 salmon catch and release data were retrieved from NPAFC statistics (NPAFC, 2020). All  
127 analyses in this study were performed using R statistical software ([https://www.r-  
128 project.org/](https://www.r-project.org/)). As revealed by changes in regional catches in the North Pacific, the number  
129 of hatchery-originated Japanese chum salmon, which occupied the bulk of the highest-ever  
130 recorded catch, 117 million fish in 1996, had drastically shrunk by 2019 (Figure 1;  
131 Supporting Information Table S1). In contrast, the total catch was relatively stable in  
132 Alaska, with some regional variation, while slight decreases were observed in southeastern  
133 Alaska (SEA), British Columbia (BC) and Washington (WA).

134

135 We analyzed trends in catches in Russian areas and Japan and Korea (1971–2019)  
136 (Supporting Information Figure S3). A Mann-Kendall trend test using the 'MannKendall'  
137 function in R confirmed that Russian catch trends after 1996, with the exception of  
138 southwestern Sakhalin, were all significantly positive, with remarkable increases in the  
139 catch identified in the following locations: eastern Kamchatka ( $\tau = 0.68$ ,  $p = 0.00004$ ),

140 Kuriles ( $\tau = 0.73$ ,  $p = 0.00000$ ), western Kamchatka ( $\tau = 0.73$ ,  $p = 0.00000$ ), Continental  
141 Coast ( $\tau = 0.40$ ,  $p = 0.00634$ ), Sakhalin Coast ( $\tau = 0.71$ ,  $p = 0.00000$ ), Amur River Basin ( $\tau$   
142  $= 0.74$ ,  $p = 0.00000$ ), Primorye ( $\tau = 0.61$ ,  $p = 0.00004$ ) and southwestern Sakhalin ( $\tau =$   
143  $0.25$ ,  $p = 0.09650$ ). Despite having the highest number of released fish, Japan was the only  
144 country in Asia exhibiting a significant decrease ( $\tau = -0.65$ ,  $p = 0.00001$ ). Korea also  
145 experienced a decreased catch, but this decrease was insignificant ( $\tau = -0.02$ ,  $p = 0.90130$ ).  
146 Chum salmon catches have significantly increased in all areas of Russia since 1996, while  
147 the catch has been decreasing in southwestern Sakhalin since around 2010. In 2019,  
148 substantial drops were observed on the Continental Coast, the Amur River Basin and  
149 Primorye. Korean catches have remained very small. Overall, long-term increasing trends  
150 were found in all areas of Russia since 1996, with a substantial drop observed only in  
151 Japan despite continuous releases of huge numbers of juveniles.

152  
153 Next, we organized the number of released and returning chum salmon by area in Japan.  
154 The largest numbers of returning chum salmon were caught in the Sea of Okhotsk and on  
155 the Pacific coast of northern Japan, the latter affected by the cold-water Oyashio current.  
156 The catch in Iwate Prefecture was particularly notable in 1996, when the total catch in  
157 Japan was at a historical maximum of 81 million (Figure 2a; Supporting Information Table  
158 S2). In contrast, very small catches were obtained on the coast of the Sea of Japan, which  
159 is affected by the warm-water Tsushima current, and on the southern Pacific coast. In  
160 2006, populations on the Pacific coast of Honshu rapidly decreased, whereas decreases on  
161 the Pacific coast of Hokkaido were insubstantial. Substantial declines occurred in all areas  
162 in 2014, particularly on the Pacific coast, with further shrinkage in 2019 even though the  
163 number of released chum salmon had been stable for two decades throughout Japan  
164 (Supporting Information Figure S4). In contrast, the Russian catch on Iturup Island  
165 markedly increased and reached a historical maximum of 8.3 million in 2019, which was  
166 equivalent to 55% of the total catch in Hokkaido (Figure 2a).

## 167 168 **2.2 Correlation between SST and chum salmon catch on Japanese coasts**

169 We updated our previous analysis of catch/release and SST (Kitada, 2018) with new data  
170 (2017–2019) and extended our seasonal analysis using data summarized for spring (April–  
171 June), summer (July–September), autumn (October–December) and winter (January–  
172 March). SST data for four areas—Kushiro-Oki (Hokkaido Pacific coast), Hokkaido Sea of  
173 Japan coasts, Sanriku-Oki (Honshu Pacific coast) and Honshu Sea of Japan coasts—were  
174 retrieved from the Japan Meteorological Agency (<http://www.data.jma.go.jp>; accessed  
175 July, 2020). We averaged SSTs over the four areas for each season. The linear regression  
176 between the number of chum salmon returning to Japan and SST anomalies (Supporting  
177 Information Table S3) was examined using the R ‘lm’ function.

178  
179 Mean SST in spring (April–June) and summer (July–September) was negatively correlated  
180 with catch but not correlated in autumn (October–December) or winter (January–March)  
181 (Table 1). Almost all fish returning to Japan were 3 to 6 years old (Miyakoshi, Nagata,  
182 Kitada, & Kaeriyama, 2013); therefore, average SST values 2 to 5 years before the return  
183 year might be a reasonable explanatory variable corresponding to chum salmon juvenile  
184 stages. The average summer SST 2 to 5 years before return was significantly negatively  
185 correlated with catch ( $r = -0.69$ ,  $t = -4.5$ ,  $df = 22$ ,  $p = 0.0002$ ) and had the highest  
186 coefficient of determination ( $R^2 = 0.48$ ,  $F = 20.2$ ,  $df = (1, 22)$ ,  $p = 0.0002$ ), thus  
187 demonstrating that 48% of the variation in decreasing catch was explained by the summer



188 SST (Table 1; Figure 2b). The results of our regression analysis suggest that warming  
189 SSTs reduced juvenile survival rates during summer in coastal waters, whereas SSTs in  
190 autumn and winter had no effect on survival rates of homing adults. Homing chum salmon  
191 frequently descended into deep water (>100 m) off the Sanriku coast, Honshu, from early  
192 October to December, which suggests that this behavior avoided high SSTs and helped  
193 minimize metabolic energy costs (Tanaka, Takagi, & Naito, 2000).

194

### 195 **3 | POPULATION STRUCTURE AND GENETIC DIVERSITY**

#### 196 **3.1 Data sets**

197 International sampling of chum salmon has been conducted cooperatively across its  
198 distribution range to establish baseline genotype data for effective genetic stock  
199 identification in high sea fisheries (e.g., Beacham, Candy, Le, & Wetklo, 2009; Seeb,  
200 Crane, & Gates, 1995; Seeb & Crane, 1999; Urawa, Azumaya, Crane, & Seeb, 2005;  
201 Urawa et al., 2009; Wilmot et al., 1994). Population structure has also been extensively  
202 studied using various markers, such as isozymes (Kijima & Fujio, 1979; Okazaki, 1982;  
203 Wilmot et al., 1994; Seeb, Crane, & Gates, 1995; Sato & Urawa, 2015; Seeb & Crane,  
204 1999; Winans, Aebersold, Urawa, & Varnavskaya, 1994) and mitochondrial DNA  
205 (mtDNA) (Garvin, Saitoh, Churikov, Brykov, & Gharrett, 2010; Park, Brainard, Dightman,  
206 & Winans, 1993; Sato et al., 2004; Yoon et al., 2008). Minisatellite (Taylor, Beacham, &  
207 Kaeriyama, 1994) and microsatellite markers (Beacham, Sato, Urawa, Le, & Wetklo,  
208 2008; Beacham, Candy, Le, & Wetklo, 2009; Beacham et al., 2009; Olsen et al., 2008) and  
209 SNPs (Garvin et al., 2013; Sato, Templin, Seeb, Seeb, & Urawa, 2014; Seeb et al., 2011;  
210 Small et al., 2015) were also used. We screened the published literature and found several  
211 publicly available genetic data sets covering the distribution range of the species, including  
212 Japan. These data, which comprised microsatellites (Beacham et al., 2009), SNP genotypes  
213 (Seeb et al., 2011), isozyme allele frequencies (Seeb, Crane, & Gates, 1995) and mtDNA  
214 haplotype counts (Sato et al., 2004), were subsequently analyzed in this study.

215

216 The dynamics of neutral genetic markers are mainly controlled by genetic drift and  
217 migration. Neutral loci across the genome can be similarly affected by the evolutionary  
218 history of population expansion, whereas loci under selection often behave differently  
219 during adaptation to local environments (Luikart, England, Tallmon, Jordan, & Taberlet,  
220 2003; Waples & Gaggiotti, 2006). Microsatellites can be used as neutral markers. The  
221 SNPs analyzed in the present study, which were originally chosen by Seeb et al. (2011) to  
222 improve the resolution of genetic stock identification (Smith, Elfstrom, Seeb, & Seeb,  
223 2005; Elfstrom, Smith, & Seeb, 2007), are located on positively selected genes identified  
224 by scanning the genomes of humans and chimpanzees (Nielsen et al. 2005). The functions  
225 of these genes include immune responses and olfactory and chemosensory perceptions. We  
226 compared the population genetic structures of the two types of genetic markers, namely,  
227 microsatellites (Beacham et al., 2009) and SNPs (Seeb et al., 2011), to better understand  
228 the evolutionary history, environmental adaptation, and genetic effects of hatchery releases.

229

#### 230 **3.2 Methods**

231 To infer the population structure of chum salmon, we used the bias-corrected  $G_{ST}$  moment  
232 estimator to compute pairwise  $F_{ST}$  (Nei & Chesser, 1983). Our previous coalescent  
233 simulations found that Nei and Chesser's bias-corrected  $G_{ST}$  moment estimator performs  
234 the best among  $F_{ST}$  estimators when estimating pairwise  $F_{ST}$  values (Kitada, Nakamichi, &  
235 Kishino, 2017). Our previous simulations mimicking population colonization from a single

236 ancestral population also demonstrated that Nei and Chesser's  $G_{ST}$  estimator correctly  
237 traces population expansion history based on genetic diversity (Kitada, Nakamichi, &  
238 Kishino, 2020). After converting the SNP genotype data to Genepop format (Rousset,  
239 2008), we computed genome-wide pairwise  $F_{ST}$  values (averaged over loci) using the  
240 'pop\_pairwiseFST' function in the R package FinePop2\_ver.0.4 on CRAN.

241

242 Genetic variation is a critical measure for understanding population history (Prado-  
243 Martinez et al., 2013). To infer the evolutionary history of chum salmon, we used the  
244 expected heterozygosity ( $H_e$ ) of a population as a measure. Because newly derived  
245 populations have had fewer opportunities for mutations to appear, they have smaller  
246 heterozygosity values compared with established populations. We computed the mean  $H_e$   
247 of each population. For SNPs,  $H_e$  was computed using the 'read.GENEPOP' function in  
248 FinePop2\_ver.0.4. A neighbor-joining (NJ) tree (Saitou & Nei, 1987) based on the pairwise  
249  $F_{ST}$  distance matrix was inferred using the 'nj' function in the R package 'ape'. Multi-  
250 dimensional scaling (MDS) was applied to the pairwise  $F_{ST}$  distance matrices using the  
251 'cmdscale' function in R. We integrated  $H_e$  and pairwise  $F_{ST}$  values onto an unrooted NJ  
252 tree using a color gradient for population  $i$  rendered as  $\text{rgb}(1 - H_{e0,i}, 0, H_{e0,i})$ , where  
253  $H_{e0,i} = (H_{e,i} - \min H_e) / (\max H_e - \min H_e)$ . This conversion represents the standardized  
254 magnitude of an  $H_e$  value at the sampling point, with colors ranging from blue to red (for  
255 the smallest and largest  $H_e$  values, respectively). For the data sets used in our analyses, we  
256 recorded approximate longitudes and latitudes of sampling sites based on the names of  
257 rivers and/or areas and maps from the original studies using Google Maps. Sampling  
258 locations with pairwise  $F_{ST}$  values smaller than a given threshold were connected by lines  
259 to visualize the gene flow between populations. For the analysis, R code was applied from  
260 Kitada, Nakamichi and Kishino (2020).

261

### 262 **3.3 Evolutionary history of chum salmon and Japanese populations**

263 Microsatellite allele frequencies of chum salmon were retrieved from the website of the  
264 Molecular Genetics Lab, Fisheries and Oceans Canada ([https://www.pac.dfo-  
265 mpo.gc.ca/science/facilities-installations/pbs-sbp/mgl-lgm/data-donnees/index-eng.html](https://www.pac.dfo-mpo.gc.ca/science/facilities-installations/pbs-sbp/mgl-lgm/data-donnees/index-eng.html),  
266 accessed on August 1<sup>st</sup>, 2020), whose data consisted of allele frequencies at 14 loci from  
267 381 localities throughout the distribution range ( $n = 51,355$ ) (Beacham et al., 2009). The  
268 data set comprised baseline allele frequencies throughout the Pacific Rim obtained from  
269 Canada, Korea, Russia, the United States and Japan (Supporting Information Table S4; see  
270 Beacham et al., 2009 for detailed sampling locations).

271

272 Calculated pairwise  $F_{ST}$  values based on these microsatellite data were  $0.0185 \pm 0.0103$   
273 (SD). In the unrooted NJ tree generated from this data set, four large regional population  
274 groupings were evident: (i) Japan/Korea/Southern Russia (Sakhalin, Amur and Primorye),  
275 (ii) Russia/Western Alaska/Yukon (Canada), and (iii) SEA/Northern BC and Alaskan  
276 Peninsula, and (iv) Southern BC/WA (Figure 3a). These results were generally in  
277 agreement with groupings based on minisatellite loci (Taylor, Beacham, & Kaeriyama,  
278 1994) as well as the results of the original study (Beacham, Candy, Le, & Wetklo, 2009)  
279 based on chord distances (Cavalli-Sforza & Edwards, 1967). Interestingly, Japanese and  
280 Korean populations were tightly clustered together but closely related to Russian ones, thus  
281 demonstrating the within-population genetic similarity of Japanese/Korean populations and  
282 their genetic similarity to Russian populations. Integration of the unrooted NJ tree with  
283 genetic diversity values revealed that Japanese populations had the highest  $H_e$  (Figure 3b;

284 Supporting Information Table S4). *He* was slightly lower in Russia and western Alaska; it  
285 was even lower in SEA/BC/WA and extremely low on Kodiak Island and in the Canadian  
286 Yukon. Chum salmon in the Sturgeon River on Kodiak Island were the most isolated and  
287 had the lowest *He*; this result is in agreement with previous research implying that this  
288 population is genetically isolated and that an insufficient number of generations has likely  
289 passed since the beginning of gene flow to adjacent populations (Petrou et al., 2014; Seeb,  
290 & Crane, 1999). The low genetic diversity observed at the edges of the NJ tree indicate that  
291 these groups have shallow population histories.

292  
293 Focusing on the subtree of North American populations, we found that *He* was highest on  
294 the western Alaskan coast (Norton Sound North/Kuskokwim Bay/Northeast Bristol Bay)  
295 (Supporting Information Figure S5). As demonstrated by the fossil record and molecular  
296 data, Atlantic and Pacific salmon had diverged by the early Miocene after the opening of  
297 access to Arctic drainages (~20 million years ago [mya]), and the three most closely related  
298 species—pink, chum and sockeye salmon—can be distinguished in the fossil record by 6  
299 mya (McPhail, 1997; Montgomery, 2000; Waples, Pess, & Beechie, 2008). Active geologic  
300 history of northwestern North America in the Miocene might drive speciation of Pacific  
301 salmon (Montgomery, 2000; Waples, Pess, & Beechie, 2008). Our result was consistent  
302 with these results, suggesting that chum salmon originated in western Alaska and then  
303 expanded to the Yukon (Canada), the Chukchi Sea in the Arctic Ocean, the Alaskan  
304 Peninsula, SEA, BC and WA.

305  
306 Three clusters were identified in the Asian subtree, namely, Japan/Korea, southern Russia  
307 (Sakhalin/Amur/Primorye) and northern Russia (Magadan/Northern Sea of  
308 Okhotsk/Kamchatka/Northeast Russia) (Supporting Information Figure S6a). The clear  
309 south-to-north *He* geographical cline suggests the introgression of Japanese chum salmon  
310 into Russian populations at neutral loci (Supporting Information Figure S6b). Using the  
311 criterion of pairwise  $F_{ST} < 0.01$  ( $4Nm > 99$ , see Waples & Gaggiotti, 2006), we identified  
312 substantial gene flow between American and Asian populations. In addition, Japanese  
313 populations were found to be connected to Russian and Korean populations (shown as  
314 yellow lines in Figure 3c), implying a history of population expansion. When we used a  
315 slightly larger pairwise  $F_{ST}$  criterion,  $F_{ST} < 0.012$  ( $4Nm > 82$ ), Japanese populations were  
316 directly connected to western Alaskan ones (Supporting Information Figure S7). These  
317 results suggest that introgression of Japanese chum salmon into Russian and Alaskan  
318 populations has occurred. Genetic stock identification studies have determined that  
319 Japanese chum salmon represent 70% of mature chum salmon in the central Bering Sea  
320 (Urawa, Azumaya, Crane, & Seeb, 2009), with corresponding percentages of 23%–40% in  
321 the eastern Bering Sea (Wilmot et al., 1998), 66% in the North Pacific and 37% in the  
322 Central Gulf of Alaska (Beacham et al., 2009). Mature chum salmon originating from  
323 Hokkaido account for 86% of the mature population on the east coast of Kamchatka in  
324 August but only 13% in the southwestern Bering Sea (Seeb et al., 2011). According to  
325 estimates based on fin/operculum clipping marking studies, the straying rate of hatchery-  
326 reared Japanese chum salmon is ~50% in Hokkaido (Kitada, 2020), a level consistent with  
327 the results of an otolith thermal-marking study of chum salmon in Alaska that found that  
328 51% of fish were hatchery-origin strays (McConnell et al., 2018). The substantial level of  
329 mixing in the North Pacific and high straying rate of Japanese hatchery-reared chum  
330 salmon might cause introgression from Japan into Russian and American populations (see  
331 Supplemental discussion).



332

333 Increased genetic diversity, as assessed from microsatellites and SNPs, has been observed  
334 in stocked populations of lake trout (Valiquette, Perrier, Thibault, & Bernatchez, 2014;  
335 Ferchaud, Laporte, Perrier, & Bernatchez, 2018) and Atlantic salmon (Ozerov et al., 2016).  
336 According to the authors of those studies, one possible cause for the observed increase in  
337 genetic diversity is the fact that released seeds were produced from non-native broodstock.  
338 Transplantation from non-natal rivers has been found to influence the genetic  
339 characteristics of some Japanese river populations (Beacham, Candy, Le, & Wetklo, 2009).  
340 Huge numbers of chum salmon juveniles were transplanted into the Chitose River from all  
341 areas of Hokkaido during the 1960s and 1980s, and massive numbers of juveniles were  
342 then transferred from the Chitose Hatchery to almost all hatcheries in Japan (Kaeriyama  
343 and Qin, 2014). The Chitose Hatchery, established in 1888, is the oldest national hatchery  
344 in Japan (Kobayashi, 1980). We produced a statistical summary and found that 1.24 billion  
345 eggs were transplanted from hatcheries in Hokkaido to rivers in Honshu over 60 years  
346 between 1928 and 1985; the highest intensity was in the 1980s, when the Chitose Hatchery  
347 was a major source of transplantation (Supporting Information Table S5 and Figure S8). In  
348 1985, when the first Korean chum salmon hatchery was constructed, 100,000 eggs were  
349 transferred to Korea from the Chitose Hatchery. This transplantation of eggs is a possible  
350 reason why Japanese chum salmon populations have the highest microsatellite genetic  
351 diversity.

352

353 A large population size, as seen in Japanese chum salmon (Figure 1), would increase the  
354 chance of mutations at neutral sites in the genome. The estimated size of the salmon  
355 genome is  $\sim 3 \times 10^9$  bp (Davidson et al., 2010). Mutation rates of genes may be lower in  
356 colder environments (Balloux, Handley, Jombart, Liu, & Manica, 2009; Koyano &  
357 Kishino, 2010), and a lower incubation temperature has been found to lead to a lower  
358 mutation rate in Atlantic salmon (*Salmo salar*) (Edvardsen, Leininger, Kleppe,  
359 Skafnesmo, & Wargelius, 2014). The higher incubation temperature of Japanese chum  
360 salmon hatcheries ( $\sim 8^\circ\text{C}$ ) compared with natural streams ( $1.1\text{--}2.8^\circ\text{C}$ ) (Ando et al., 2014)  
361 could increase the mutation rate of neutral sites. In addition, the very high egg-to-release  
362 survival rate ( $\sim 90\%$ ) in Japanese hatcheries (Supporting Information Supplemental Note)  
363 might relax natural selection (Araki, Berejikian, Ford, & Blouin, 2008) and contribute to  
364 maintain mutations. A large number of parent fish have been used since the mid-1970s in  
365 Hokkaido (Kitada, 2014; Supporting Information Supplemental Note), which should also  
366 contribute to maintain the genetic diversity of populations (Kitada, 2018).

367

### 368 **3.4 Environmental adaptation and hatchery-derived selection**

369 SNP genotypes retrieved from the Dryad data repository included 58 SNPs from 114  
370 samples throughout the whole distribution range (Supporting Information Table S6; Figure  
371 S9) (Seeb et al, 2011). We excluded five loci analyzed in the original study, namely,  
372 *Oke\_U401-220*, *Oke\_GHII-2943*, *Oke\_IL8r-272*, *Oke\_U507-87* and a mtDNA-combined  
373 locus, thus leaving 53 SNPs in our analysis ( $n = 10,458$ ). These SNPs are located on  
374 rapidly evolving genes (Elfstrom, Smith, & Seeb, 2007; Seeb et al., 2011).

375

376 Pairwise  $F_{ST}$  values based on SNP allele frequencies were  $0.0531 \pm 0.0362$ , which is 2.9-  
377 fold higher than values calculated from microsatellite markers ( $0.0185 \pm 0.0103$ ). Four  
378 large regional population groupings were evident in the unrooted NJ tree: (i) Japan/Korea,  
379 (ii) Russia, (iii) Alaska and (iv) the Alaskan Peninsula, SEA, BC and WA (Figure 4a).

380 These results are generally in agreement with the findings of the original study (Seeb et al.,  
381 2009) that were based on pairwise  $F_{ST}$  values of  $\theta$  (Weir & Cockerham, 1984). Consistent  
382 with microsatellite-based inferences, the SNP data indicate that the Sturgeon River  
383 population became isolated on Kodiak Island. The northernmost Russian population, in  
384 Anadyr, diverged from the Alaskan population and expanded to Kamchatka and Amur.  
385 Populations in Susitna, Alaska, were isolated and remained closely related to the  
386 population in Anadyr. Japanese populations branched off from Anadyr separately from  
387 those of Kamchatka and Amur, which are phylogenetically more closely related to Alaskan  
388 populations. Japanese populations further differentiated from the Anadyr population.

389  
390 As inferred from the integrated NJ tree, the highest levels of  $H_e$  were found in Stuyahok,  
391 Mulchatna and Nushagak rivers in coastal western Alaska and the Meshik River in Bristol  
392 Bay South, while the lowest  $H_e$  values were observed in WA, Korea and Japan (Figure 4b;  
393 Supporting Information Table S6). Ascertainment bias might contribute to the high levels  
394 of allelic richness in Alaska; however, its effects were expected to be minimal within  
395 Alaskan samples, and tests comparing levels of diversity in the samples were deemed  
396 appropriate (Seeb et al., 2011). Analysis of the population structure inferred from SNPs  
397 suggested that chum salmon originated in coastal western Alaska/Bristol Bay South, a  
398 conclusion consistent with the microsatellite data. The species then expanded to Russia, the  
399 Chukchi Sea, Yukon/Kuskokwim, the Alaskan Peninsula, SEA/BC and WA and adapted to  
400 local environments. Using the same criterion used with microsatellite markers, namely,  
401 pairwise  $F_{ST} < 0.01$  ( $4Nm > 99$ ), we detected substantial gene flow within American  
402 populations but very little between Russian populations (Figure 4c). Japanese and Korean  
403 populations appeared to be isolated. When we used a slightly large  $F_{ST}$  criterion, pairwise  
404  $F_{ST} < 0.02$  ( $4Nm > 49$ ), Russian populations were found to be connected with western  
405 Alaskan ones (Supporting Information Figure S10), which supports the hypothesis that  
406 chum salmon originated in western Alaska and expanded within Alaska and thence to  
407 SEA/WA and Asia. Many Japanese populations were found to be connected with the  
408 Namdae River, Korea, thus implying a history of translocation.

409  
410 To summarize all of the above-mentioned results, we compared population structures and  
411  $H_e$  obtained using neutral and adaptive markers. The MDS plot based on microsatellite loci  
412 uncovered gene flow between American populations and revealed the nested population  
413 structure of Japanese/Korean and southern Russian samples (Sakhalin, Amur and  
414 Primorye) as well as Japanese/Korean ones located close to northern Russian samples  
415 (Figure 5a). This result implies the occurrence of gene flow from Japan to Russia.  $H_e$   
416 values were the highest in Japanese/Korean samples, followed by samples from Megadan  
417 (North Sea of Okhotsk) and East Kamchatka, Russia, suggesting introgression of Japanese  
418 chum salmon into these areas (Supporting Information Figure S11a). MDS of the SNP data  
419 (after Seeb et al., 2009) uncovered a pattern in the American and Russian populations  
420 similar to that revealed by microsatellites, whereas Japanese/Korean populations were  
421 isolated from Russia (Figure 5b). In contrast to population structure based on  
422 microsatellites, no introgression of Japanese/Korean alleles into Russian populations was  
423 suggested by the population structure of SNPs located on rapidly evolving genes. Instead,  
424 the two groups were separated from the others, namely, from the Alaskan group and the  
425 group constituting the Alaskan Peninsula, SEA, BC and WA. Because the genes harboring  
426 the analyzed SNPs were crucial to environmental adaptation, introgression of alleles from  
427 Japanese/Korean populations was not likely to have been successful.  $H_e$  values were the

428 highest in Alaska with a clear latitudinal cline, implying the history of environmental  
429 adaptation (Supporting Information Figure S11b). Genetic effects due to hatchery-derived  
430 selection in Japanese/Korean populations were thus probably detected in our analyses.  
431

## 432 **4 | DETECTION OF GENES UNDERGOING HATCHERY-DERIVED** 433 **SELECTION**

### 434 **4.1 Data sets**

435 To explore genes affected by hatchery-derived selection and environmental adaptation, we  
436 performed a meta-analysis of combined SNPs, isozymes and mtDNA allele/haplotype  
437 frequencies. In addition to the SNPs analyzed above, we focused on LDH, an isozyme  
438 marker potentially useful for understanding physiological thermal adaptation and the  
439 evolutionary consequences of artificial selection in salmonids and marine fish populations  
440 (Chen, Farrell, Matala, & Narum, 2018; Nielsen, Hemmer-Hansen, Larsen, & Bekkevold,  
441 2009). *LDH-A* and *LDH-B* genes are predominantly expressed in various fish species in  
442 skeletal muscle and the heart (Powers, Lauerman, Crawford, & DiMichele, 1991; Somero,  
443 2004, 2010), respectively. The loci have two codominant alleles, and their allele  
444 frequencies exhibit clear latitudinal clinal variation (Karabanov & Kodukhova, 2018;  
445 Merritt, 1972; Powers, Lauerman, Crawford, & DiMichele, 1991; Somero, 2004, 2010).  
446 For comparative purposes, we used tripeptide aminopeptidase (PEPB), as this digestive  
447 enzyme of fish (Govoni, Boehlert, & Watanabe, 1986) may experience selection pressure  
448 in hatcheries. We also focused on haplotype frequencies of the mtDNA D-loop region  
449 because recent studies have inferred that this region functions in cold-temperature  
450 adaptation and energy metabolism (Nishimura et al., 2012), dNTP metabolism (Nicholls &  
451 Minczuk, 2014) and oxygen consumption (Kong et al., 2020).  
452

453 We organized available allele frequencies of *LDH-A*, *LDH-B* and *PEPB-I* isozymes in the  
454 Pacific Rim, namely, those collected in Japan (Kijima & Fujio, 1979; Okazaki, 1982),  
455 Japan and Russia (Winans, Aebersold, Urawa, & Varnavskaya, 1994), and Alaska, the  
456 Alaskan Peninsula, SEA/BC and WA (Seeb, Crane, & Gates, 1995). To avoid problems  
457 associated with standardization of electrophoretic bands obtained in different laboratories,  
458 we used the data from the two latter studies (Winans, Aebersold, Urawa, & Varnavskaya,  
459 1994; Seeb, Crane, & Gates, 1995) because they used the same protocol (Aebersold,  
460 Winans, Teel, Milner, & Utter, 1987) and followed the genetic nomenclature of the  
461 American Fisheries Society (Shaklee, Allendorf, Morizot, & Whitt, 1990). These data were  
462 also used in another study (Seeb & Crane, 1999) that confirmed the presence of equal  
463 allele frequencies in the same rivers in Japan and Russia. All Japanese samples were  
464 caught in weirs in hatchery-enhanced rivers and hatcheries and were therefore hatchery-  
465 reared fish and/or hatchery descendants. In contrast, Russian samples were collected from  
466 natural streams; these fish were assumed to be wild because most Russian chum salmon  
467 were naturally maintained (Winans, Aebersold, Urawa, & Varnavskaya, 1994). Samples  
468 collected from three hatcheries were excluded from the North American samples (Seeb,  
469 Crane, & Gates, 1995). We obtained allele frequencies of the three isozyme loci in 81  
470 chum salmon populations in the distribution range ( $n = 14,550$ ) (Supporting Information  
471 Table S7 and Figure S12). Four alleles were found at the *LDH-A1* locus, two of which  
472 were very minor and found in only seven populations. The *LDH-B2* locus also had four  
473 alleles, but two were very minor and found in only three populations. The *PEPB-I* locus  
474 had five alleles. We used the most common alleles—*LDH-A1*\*100, *LDH-B2*\*100 and  
475 *PEPB-1*\*-100—in our meta-analysis of allele frequencies.

476

477 We also used published haplotype counts of the mtDNA D-loop region collected from 48  
478 chum salmon populations in the distribution range ( $n = 2,162$ ) (Sato et al, 2004).  
479 Haplotype frequencies of the mtDNA D-loop region were computed from the 48 chum  
480 salmon populations (Supporting Information Figure S13a). Among 30 haplotypes, the  
481 major ones were A1, B3, B13 and C1, with the B3 haplotype characterizing Alaska and  
482 Russia, B13 characterizing SEA/BC and WA, and C1 and A1 characterizing Asian  
483 populations (Supporting Information Table S8 and Figure S13b). All populations except  
484 for two Japanese populations possessed the B3 haplotype, and its frequency was fixed at  
485 1.0 in Alaska. In humans, populations living in colder climates have a lower mtDNA  
486 diversity, and this genetic differentiation is correlated with temperature (Balloux, Handley,  
487 Jombart, Liu, & Manica, 2009). In a meta-genome sample, the lowest mtDNA 16S rRNA  
488 diversity was found from Antarctica (Koyano & Kishino, 2010). These findings coincide  
489 with observations that Japanese chum salmon, followed by Russian and American  
490 populations, have the highest haplotype diversity (Sato et al., 2004). When we computed  
491 haplotype diversity (Nei & Tajima, 1981) based on the 30 haplotype counts of the mtDNA  
492 D-loop region (Sato et al., 2004), it was lowest in Alaska and negatively correlated with  
493 latitude ( $r = -0.68$ ) (Supporting Information Figure S14). These results indicate that the  
494 chum salmon mtDNA D-loop region may be thermal adaptive; they also suggest that the  
495 B3 haplotype was the ancestral, cold-adapted haplotype, with the other haplotypes derived  
496 by thermal adaptation.

497

## 498 **4.2 Meta-analysis**

499 We classified the allele/haplotype frequencies of the 53 SNPs, the mtDNA D-loop region  
500 and the three isozyme loci into six geographical groups (Japan/Korea, Russia, Alaska,  
501 Alaskan Peninsula, SEA/BC and WA) (Supporting Information Table S9). We used the  
502 minor alleles as the first alleles of all SNPs. Distributions of allele/haplotype frequencies in  
503 the six geographical groups exhibited different patterns (Supporting Information Figure  
504 S15). To detect significant geographical variations in allele frequencies in the distribution  
505 range, we conducted a principal component analysis (PCA) using the ‘prcomp’ function in  
506 R. Because the PCA identified differences between Japan/Korea and the other areas as a  
507 primary component (PC1), we performed a two-sample *t*-test of allele frequencies between  
508 Japanese/Korean and Russian/American samples for each marker using the ‘t.test’  
509 function. The *p*-values were corrected for multiple comparisons by the method of  
510 Benjamini and Hochberg (1995) (BH) using the ‘p.adjust’ function in R. The second  
511 component (PC2) corresponded to a latitudinal cline among Russian/American samples.  
512 We therefore tested the significance of the correlation between allele/haplotype frequencies  
513 and latitudes within Russian/American samples using the ‘cor.test’ function for each  
514 marker. The *p*-values were again corrected by the BH method. We also added allele  
515 frequencies to sampling locations using the R package ‘sf’. We superimposed 95%  
516 confidence ellipses of allele/haplotype-frequency scatter plots on latitudes using the R  
517 package ‘ellipse’. We researched the functions of all 57 analyzed gene markers using the  
518 GeneCards database system (<https://www.genecards.org/>) and published literature. This  
519 information is summarized along with PC1, PC2 and PC3 eigenvectors in Supporting  
520 Information Table S10. Table S10 also includes adjusted *p*-values ( $-\log_{10}q$ ) obtained  
521 from the latitudinal correlation analysis of allele frequencies within Russian and American  
522 samples and the two-sample *t*-testing of allele frequencies between Japanese/Korean and  
523 Russian/American samples.



524

### 525 **4.3 Genes exhibiting latitudinal clines**

526 In the PCA, PC1 characterized the distinctiveness of Japanese/Korean populations, while  
527 PC2 located American and Russian populations in a latitudinal cline (Figure 6a). In  
528 contrast, PC3 highlighted the difference between Alaska and Russia (Figure 6b). PC1, PC2  
529 and PC3 collectively accounted for 88% of the variance, explaining respectively 47%, 27%  
530 and 14%. PC1 comprised 13 SNPs ( $|\text{eigen vector}| > 0.15$ ) that were highly differentiated in  
531 Japanese/Korean populations: *Oke\_U502-241\**, *Oke\_GnRH-373*, *Oke\_TCP1-78*,  
532 *Oke\_IL8r-406*, *Oke\_ras1-249*, *Oke\_GHII-3129*, *Oke\_u217-172*, *Oke\_U505-112*,  
533 *Oke\_DM20-548*, *Oke\_U506-110\**, *Oke\_u200-385* (U22), *Oke\_u1-519*, *Oke\_Tf-278\** and  
534 mtDNA\_B3 (Figure 6a; Supporting Information Figure S16 and Table S10). In this list,  
535 locus names followed by an asterisk indicate five outlier SNPs identified as potential  
536 candidates for selection in the original study, while *U* and *u* designate unknown SNPs  
537 (Seeb et al., 2011). PC2 was formed by nine SNPs ( $|\text{eigen vector}| > 0.15$ ) that were highly  
538 correlated with latitude: *Oke\_MARCKS-362*, *Oke\_PP2A-635* (CTS1627), *Oke\_copa-211\**,  
539 *Oke\_RFC2-618\**, *Oke\_GPH-78*, *Oke\_u1-519*, *Oke\_FARSLA-242*, *Oke\_Tf-278\** and  
540 *Oke\_U502-241\**. Although isozyme loci *PEPB-1* and *LDH-A1* had slightly smaller  
541 loadings for PC2 ( $-0.144$  and  $0.124$ , respectively), the correlation with latitude in  
542 American and Russian samples was highly significant. Finally, seven SNPs, namely,  
543 *Oke\_U504-228*, *Oke\_U502-241\**, *Oke\_u200-385* (U22), *Oke\_RFC2-618\**, *Oke\_serpin-*  
544 *140*, *Oke\_copa-211\** and *Oke\_U506-110\**, had large loadings for PC3 ( $|\text{eigen vector}| >$   
545  $0.24$ ) (Figure 6b).

546

547 Consistent with our interpretation of the biplot, the allele frequencies of the top eight genes  
548 constituting PC1 (excluding unknown SNPs) in the Japanese/Korean populations were  
549 significantly different from those of populations in Russia and North America (Figure 7).  
550 Except for *Oke\_IL8r-406* and *Oke\_DM20-548*, their clinal variation with latitude was also  
551 significant within Russia and North America. More precisely, six of the eight genes  
552 (mtDNA\_B3, *Oke\_GnRH-37*, *Oke\_TCP1-78*, *Oke\_IL8r-406*, *Oke\_ras1-249* and  
553 *Oke\_DM20-548*) differentiated the Japanese/Korean populations, while *Oke\_GHII-3129*  
554 distinguished Japan/Korea and Alaska from the others. *Oke\_Tf-278\** strongly distinguished  
555 Japanese/Korean and WA populations. The allele frequencies of the top eight genes  
556 contributing to PC2 generally displayed a clear clinal pattern in Russia, Alaska and the  
557 western coast of North America, although this clinal variation was insignificant in the case  
558 of *Oke\_GPH78* and *Oke\_HP-182* (Supporting Information Figure S17). *Oke\_PP2A-635*  
559 (CTS1627), *Oke\_RFC2-618\** and *LDH-A1* allele frequencies were fixed at or near 0 or 1.0  
560 in southern areas (SEA/BC, WA and Japan/Korea), whereas those of *LDH-A1* in  
561 Japan/Korea were similar to those of Russia and Alaska. In regards to the top two genes  
562 constituting PC3, the allele frequency of *Oke\_copa-211\** was high in Russia and that of  
563 *Oke\_serpin-140* was high in Alaska and Japan (Supporting Information Figure S18).  
564 Geographical distributions of allele frequencies of the other 39 loci varied among the  
565 different markers (Supporting Information Figure S19). With respect to the five outlier  
566 SNPs found in the original study (Seeb et al, 2011), *Oke\_U502-241\** was much more  
567 frequent in WA and Japan/Korea, while the frequency of *Oke\_U506-110\** was higher on  
568 the Alaskan Peninsula and in SEA/BC, with the highest value, 0.92, observed in the  
569 Sturgeon River.

570

571 By inspecting allele frequencies with reference to latitude, we identified nine genes (seven



572 SNPs, mtDNA\_B3 and *LDH-A1*) that differentiated Japanese/Korean populations from  
573 those of other areas (Figure 8). With respect to mtDNA\_B3, *Oke\_GnRH-373*, *Oke\_TCP1-*  
574 *78*, *Oke\_IL8r-406* and *Oke\_ras1-249* latitudinal clines, Japan/Korea were isolated. In  
575 contrast, allele frequencies of *Oke\_Tf-278\**, *Oke\_GHII-3129*, *Oke\_serpin-140* and *LDH-*  
576 *A1* in Japan/Korea became similar to those of Alaskan samples. All Japanese samples,  
577 which were collected from hatchery-enhanced rivers, were hatchery-reared fish and/or  
578 possibly hatchery descendants (Kitada, 2020), and the contribution of natural spawning  
579 was not substantial (Iida, Yoshino, & Katayama, 2018; Kitada, 2014; Miyakoshi et al.,  
580 2012; Morita, Takahashi, Ohkuma, & Nagasawa, 2013). The altered allele frequencies  
581 could therefore have been caused by hatchery rearing repeated for more than 26  
582 generations (assuming a generation time of 5 years for 130 years). The key functions of the  
583 nine genes were divided into five biological process categories—reproduction, immune  
584 system response, DNA damage repair, growth and energy metabolism—and analyzed  
585 (Table S10).

586  
587 The SNPs in the data set used in the present study (Seeb et al., 2011) were previously  
588 characterized as rapidly evolving SNPs (e.g., located in genes related to immune response  
589 and olfactory and chemosensory perception; Nielsen et al. 2005). Determining the relative  
590 importance of selection on these specific loci would require a genome-wide analysis to be  
591 conducted (Waples, Naish, & Creig, 2020). A discussion of possible factors in hatcheries  
592 that have altered the allele frequencies of these SNPs might be useful in future analyses  
593 (Supporting Information Supplemental Discussion). Although presently undetected,  
594 selective pressure on DNA damage repair may be serious enough to cause unexpected  
595 deleterious genetic effects. Below, we focus on the thermal-adaptive mtDNA-B3 and LDH  
596 genes, which are related to energy metabolism, and discuss possible mechanisms for the  
597 catch decline in Japanese chum salmon.

## 598 599 **5 | HATCHERY-DERIVED SELECTION ON FITNESS TRAITS**

600 Japanese/Korean populations had significantly smaller frequencies of the mtDNA D-loop  
601 B3 haplotype. The distribution of this haplotype followed a latitudinal gradient (Figure 8;  
602 Supporting Information Figures S13b), suggesting derivation of the B3 haplotype as an  
603 adaptation to warmer environments. The water temperature (~8°C) widely used for egg  
604 hatching and fry rearing in Japanese chum salmon hatcheries is in fact generally much  
605 higher than that of natural streams in winter; for example, the temperature of the tributary  
606 of the Ishikari River, Hokkaido, is 1.1–2.8°C (Ando et al., 2014). The high egg-to-release  
607 survival rate (~90%) in hatcheries could relax natural selection, particularly in winter.  
608 Given that the mtDNA D-loop region may have functions in dNTP metabolism (Nicholls  
609 & Minczuk, 2014), cold temperature adaptation and energy metabolism (Nishimura,  
610 Motoi, Niri, Hoshi, Kondo, & Watanuki, 2012) and oxygen consumption (Kong et al.,  
611 2020), relaxed selection pressures in hatcheries on this region might affect energy  
612 metabolism and oxygen consumption of chum salmon. In rearing experiments involving  
613 embryos and alevin of brook trout (*Salvelinus fontinalis*), a cold-adapted species, fry  
614 acclimated to 9°C were found to have a higher Michaelis–Menten constant of pyruvate  
615 ( $K_m^{PYR}$ ) (lower substrate affinity = lower catalytic efficiency) than those acclimated at 5°C  
616 (Cook, Wilson, & Burness, 2018). Japan chum salmon reared at a higher water temperature  
617 than that of the natural environment might have a higher  $K_m^{PYR}$ , resulting in lower  
618 mitochondrial metabolic efficiency and oxygen consumption compared with native  
619 individuals that lived there in the past.

620

621 LDH-A1\*100 allele frequencies of chum salmon were distributed along a south-to-north  
622 gradient in Russian and American samples. Despite the observed significant latitudinal  
623 cline, the frequency in Japan was similar to that of Alaskan samples (Figure 8). LDH-  
624 A1\*100 allele frequencies were higher in warmer areas and lower in colder environments  
625 (Supporting Information Figure S17). Exceptionally, LDH-A1\*100 allele frequencies in  
626 Japan were significantly lower than in most American samples from SEA/BC and WA  
627 (Figure 8). Japan is located south of the other sampling locations, and a high LDH-A1\*100  
628 allele frequency, close to 1.0—the value for SEA/BC and WA—was therefore expected. In  
629 fathead minnow (*Pimephales promelas*), a temperate freshwater fish, the *LDH-A* locus has  
630 two codominant alleles: LDH-A<sup>a</sup> and LDH-A<sup>b</sup> (Merritt, 1972). A north–south cline in  
631 LDA-A allele frequencies is seen in fathead minnow, with higher frequencies of the  
632 southern-adaptive allele LDH-A<sup>a</sup> and the northern-adaptive allele LDH-A<sup>b</sup> in the south  
633 and north, respectively. At or above 25°C, the homozygote of the southern-adaptive LDH-  
634 A of fathead minnow, LDH-A<sup>aa</sup>, has been found to have a significantly lower  $K_m^{PYR}$   
635 (higher catalytic efficiency) than that of the northern-adaptive LDH-A<sup>bb</sup> and the  
636 heterozygote LDH-A<sup>ab</sup> (Merritt, 1972). Kilka (*Clupeonella cultriventris*), a small fish  
637 inhabiting brackish and fresh waters, also has two codominant alleles; LDH-A\*100  
638 frequencies are highest in its southernmost population and exhibit a clear south-to-north  
639 clinal pattern in its distribution range between 43° N to 59° N (Karabanov & Kodukhova,  
640 2018) (Supporting Information Figure S20). Consistently, the LDH-A1\*100 allele  
641 frequencies of chum salmon were fixed at or near 1.0 in SEA/BC and WA, thus suggesting  
642 that the LDH-A1\*100 allele of chum salmon is southern-adaptive. Individuals  
643 homozygous for the LDH-A1\*100 allele could have been expected in native chum salmon  
644 in Japan in the past, as they would have had a lower  $K_m^{PYR}$  (higher catalytic efficiency) in  
645 warmer environments than heterozygotes and those homozygous for the other allele.

646

647 A single amino-acid substitution in LDH-A isozymes is sufficient for adaptation of species  
648 to a new thermal range (Fields & Somero, 1998; Somero, 2004). Repeated hatchery rearing  
649 in higher water temperature have likely have led to such substitutions in the LDH-A1  
650 isozyme. Lowered LDH-A1\*100 allele frequencies reduce the percentage of homozygotes  
651 and result in higher  $K_m^{PYR}$  (lower catalytic efficiencies) at higher temperatures—as  
652 demonstrated by experiments on fathead minnow (Merritt, 1972)—leading in turn to  
653 lowered athletic performance in skeletal muscle. Chum salmon currently inhabiting Japan  
654 and Korea that are LDH-A1\*100 heterozygotes may therefore have a higher  $K_m^{PYR}$  (lower  
655 catalytic efficiency) compared with native fish living in these locations in the past. A  
656 lowered catalytic efficiency becomes even lower at higher temperatures. In contrast, LDH-  
657 B2\*100 allele frequencies are fixed at or near 1.0 in all present-day populations  
658 (Supporting Information Figures S15-2, S19-1). *LDH-B2* is related to heart activity  
659 (Powers, Lauerman, Crawford, & DiMichele, 1991; Somero, 2004) and may therefore be  
660 conserved in this species. The north-to-south gradient of PEPB-1\*-100 allele frequencies  
661 (Supporting Information Figure S17) suggests that hatchery rearing has not compromised  
662 digestive ability, which is consistent with the enhanced growth of hatchery fish fed copious  
663 amounts of food daily.

664

## 665 **6 | CONCLUSIONS**

666 Our analysis indicated that warming SSTs may reduce juvenile survival rates during  
667 summer in Japanese coastal waters. According to integrated NJ trees based on

668 microsatellite markers and SNPs, chum salmon originated in western Alaska, with the  
669 species range then expanding mainly to the south. Japanese populations had the highest  
670 genetic diversity at neutral markers. Past translocation history, accumulated mutations in  
671 the large population and the large number of parent fish used for seed production may be  
672 responsible for the high genetic diversity. Very high egg-to-release survival rates (~90%)  
673 in hatcheries can relax natural selection and work to maintain mutations. Our meta-analysis  
674 revealed that allele frequencies of many genes follow a latitudinal gradient, reflecting the  
675 evolutionary history of this species, while those of some genes in Japanese/Korean  
676 populations have become isolated. Our analysis first identified nine genes revealing the  
677 distinctiveness of the Japanese/Korean populations that might be altered by long-term  
678 hatchery operations. The key functions of these nine genes were divided into five  
679 biological process categories, namely, reproduction, immune system response, DNA  
680 damage repair, growth and energy metabolism. Altered allele frequencies of *Oke\_GnRH-*  
681 *373* in Japanese chum salmon populations may reduce ability to return to natal rivers and  
682 cause high straying (Supporting Information Supplemental Discussion), thus leading to  
683 introgression from Japan into Russian and Alaskan rivers, as found in neutral markers.  
684 LDH and mtDNA-B3 genes, which are related to energy metabolism and oxygen  
685 consumption, are thermal adaptive. The southern-adapted alleles of LDH-A1\*100,  
686 predominantly expressed in skeletal muscle, have often been replaced by ancestral alleles,  
687 while the ancestral mtDNA-B3 haplotype is significantly rarer in Japanese/ Korean  
688 populations. This genetic replacement in thermally adapted genes may result in lower  
689 metabolic efficiencies in skeletal muscle and mitochondria at higher temperatures. Field  
690 experiments have demonstrated that Japanese hatchery fish have lower athletic ability  
691 (Kobayashi & Ohkuma, 1983; Sasaki, 2018) and lower metabolic efficiency (Shimizu *et*  
692 *al.*, 2016), and our observations of YouTube videos consistently indicated the slow  
693 movement of Japanese chum salmon (Supporting Information Supplemental Discussion).  
694 Such physiological changes may reduce survival rates of hatchery-born juveniles on  
695 Japanese coasts in the face of warming SSTs and also in the Sea of Okhotsk, where  
696 competition for food is expected to be high because of substantially increased Russian  
697 chum salmon abundance. Almost all chum salmon returning to Japan are hatchery-released  
698 fish or possibly wild-born hatchery descendants (Kitada, 2020) that have distinct genetic  
699 characteristics, as demonstrated in this study. Japanese chum salmon populations may thus  
700 continue to decline, with variations, under current hatchery practices, as reduction in  
701 survival rates of hatchery-reared fish is cohort-specific and constant over time within a  
702 cohort (Kitada *et al.*, 2019). Our results, which were obtained from the world's largest  
703 marine stock enhancement program, should inform our understanding of long-term impacts  
704 of animal artificial propagation, including that of salmonids and marine and freshwater  
705 species, for fisheries and conservation objectives.

706

707

## 708 **ACKNOWLEDGMENTS**

709 This research was heavily dependent on SNP genotypes of chum salmon throughout the  
710 distribution range maintained by Lisa W. Seeb and her colleagues and also relied on North  
711 Pacific baseline microsatellite allele frequencies maintained by Terry D. Beacham and his  
712 colleagues at Fisheries and Oceans Canada. We also thank scientists and staff members  
713 who contributed to the collection of samples over the past three decades. We express our  
714 appreciation to Craig Primmer for his encouragement and constructive comments on an  
715 early version of the manuscript, which improved the paper substantially. This study was

716 supported by Japan Society for the Promotion of Science Grants-in-Aid for Scientific  
717 Research KAKENHI (nos. 18K0578116 to SK and 19H04070 to HK). We thank Barbara  
718 Goodson, Edanz Group, for editing the English text of a draft of this manuscript.

719

## 720 **CONFLICT OF INTEREST**

721 None declared.

722

## 723 **AUTHOR CONTRIBUTIONS**

724 S.K. and H.K conceived the study, analyzed the data and wrote the manuscript.

725

## 726 **DATA AVAILABILITY STATEMENT**

727 The authors affirm that all data necessary for confirming the conclusions of this article are  
728 present within the article, figures and supporting information.

729

## 730 **REFERENCES**

- 731 Aebersold, P. B., Winans, G. A., Teel, D. J., Milner, G. B., & Utter, F. M. (1987). Manual  
732 for starch gel electrophoresis: a method procedures for detection of genetic variation.  
733 *NOAA Technical Reports*, 61, 19 p.
- 734 Amoroso, R. O., Tillotson, M. D., & Hilborn, R. (2017). Measuring the net biological  
735 impact of fisheries enhancement: Pink salmon hatcheries can increase yield, but with  
736 apparent costs to wild populations. *Canadian Journal of Fisheries and Aquatic*  
737 *Sciences*, 74, 1233–1242. <https://doi.org/10.1139/cjfas-2016-0334>
- 738 Ando, D., Shinriki, Y., Shimoda, K., Yasutomi, R., Sasaki, Y., Miyakoshi, Y., & Nakajima,  
739 M. (2014). Effects of spawning time on the variation of vertebral numbers in chum  
740 salmon *Oncorhynchus keta*. *Nippon Suisan Gakkaishi*, 80, 191–200. (in Japanese  
741 with English abstract) <https://doi.org/10.2331/suisan.80.191>
- 742 Araki, H., Cooper, B., & Blouin, M. S. (2007). Genetic effects of captive breeding cause a  
743 rapid, cumulative fitness decline in the wild. *Science*, 318, 100–103. doi:  
744 10.1126/science.1145621
- 745 Araki, H., Cooper, B., & Blouin, M. S. (2009). Carry-over effect of captive breeding  
746 reduces reproductive fitness of wild-born descendants in the wild. *Biology Letters*, 5,  
747 621–624. <https://doi.org/10.1098/rsbl.2009.0315>
- 748 Araki, H., Berejikian, B. A., Ford, M. J., & Blouin, M. S. (2008). Fitness of hatchery -  
749 reared salmonids in the wild. *Evolutionary Applications*, 1, 342–355.  
750 <https://doi.org/10.1111/j.1752-4571.2008.00026.x>
- 751 Balloux, F., Handley, L. J. L., Jombart, T., Liu, H., & Manica, A. (2009). Climate shaped  
752 the worldwide distribution of human mitochondrial DNA sequence variation.  
753 *Proceedings of the Royal Society B: Biological Sciences*, 276, 3447–3455.  
754 <https://doi.org/10.1098/rspb.2009.0752>
- 755 Beacham, T. D., Sato, S., Urawa, S., Le, K. D., & Wetklo, M. (2008). Population structure  
756 and stock identification of chum salmon *Oncorhynchus keta* from Japan determined  
757 by microsatellite DNA variation. *Fisheries Science*, 74, 983–994.  
758 <https://doi.org/10.1111/j.1444-2906.2008.01616.x>
- 759 Beacham, T. D., Candy, J. R., Le, K. D., & Wetklo, M. (2009). Population structure of  
760 chum salmon (*Oncorhynchus keta*) across the Pacific Rim, determined from  
761 microsatellite analysis. *Fishery Bulletin*, 107, 244–260.  
762 <http://fishbull.noaa.gov/1072/beacham.pdf>



- 763 Beacham, T. D., Candy, J. R., Wallace, C., Urawa, S., Sato, S., Varnavskaya, N. V., ... &  
764 Wetklo, M. (2009). Microsatellite stock identification of chum salmon on a Pacific  
765 Rim basis. *North American Journal of Fisheries Management*, 29(6), 1757-1776.
- 766 Beamish, R. J., Mahnken, C., & Neville, C. M. (1997). Hatchery and wild production of  
767 Pacific salmon in relation to large-scale, natural shifts in the productivity of the  
768 marine environment. *ICES Journal of Marine Science*, 54, 1200–1215.  
769 [https://doi.org/10.1016/S1054-3139\(97\)80027-6](https://doi.org/10.1016/S1054-3139(97)80027-6)
- 770 Beamish, R. J. (2017). What the past tells us about the future of Pacific salmon research.  
771 *Fish & Fisheries*, 18, 1161–1175. <https://doi.org/10.1111/faf.12231>
- 772 Benjamini, Y., & Hochberg, Y. (1995). Controlling the false discovery rate: a practical and  
773 powerful approach to multiple testing. *Journal of the Royal Statistical Society: series*  
774 *B (Methodological)*, 57, 289–300. <https://doi.org/10.1111/j.2517-161.1995.tb02031.x>
- 775 Cavalli-Sforza, L. L., & Edwards, A. W. (1967). Phylogenetic analysis. Models and  
776 estimation procedures. *American Journal of Human Genetics*, 19, 233–257. PMID:  
777 6026583
- 778 Chen, Z., Farrell, A. P., Matala, A., & Narum, S. R. (2018). Mechanisms of thermal  
779 adaptation and evolutionary potential of conspecific populations to changing  
780 environments. *Molecular Ecology*, 27, 659–674. <https://doi.org/10.1111/mec.14475>
- 781 Christie, M. R., Marine, M. L., French, R. A., & Blouin, M. S. (2012). Genetic adaptation  
782 to captivity can occur in a single generation. *Proceedings of the National Academy of*  
783 *Sciences*, 109, 238–242. doi: 10.1073/pnas.1111073109
- 784 Christie, M. R., Ford, M. J., & Blouin, M.S. (2014). On the reproductive success of early-  
785 generation hatchery fish in the wild. *Evolutionary Applications*, 7, 883–896.  
786 <https://doi.org/10.1111/eva.12183>
- 787 Christie, M. R., Marine, M. L., Fox, S. E., French, R. A., & Blouin, M. S. (2016). A single  
788 generation of domestication heritably alters the expression of hundreds of genes.  
789 *Nature Communications*, 7, 10676. <https://doi.org/10.1038/ncomms10676>
- 790 Cline, T. J., Ohlberger, J., & Schindler, D. E. (2019). Effects of warming climate and  
791 competition in the ocean for life-histories of Pacific salmon. *Nature Ecology &*  
792 *Evolution*, 3, 935–942. <https://doi.org/10.1038/s41559-019-0901-7>
- 793 Cook, C. J., Wilson, C. C., & Burness, G. (2018). Impacts of environmental matching on  
794 the routine metabolic rate and mass of native and mixed-ancestry brook trout  
795 (*Salvelinus fontinalis*) fry. *Conservation Physiology*, 6, coy023.  
796 <https://doi.org/10.1093/conphys/coy023>
- 797 Davidson, W. S., Koop, B. F., Jones, S. J., Iturra, P., Vidal, R., Maass, A., ... & Omholt, S.  
798 W. (2010). Sequencing the genome of the Atlantic salmon (*Salmo salar*). *Genome*  
799 *Biology*, 11, 403. <https://doi.org/10.1186/gb-2010-11-9-403>
- 800 Edvardsen, R. B., Leininger, S., Kleppe, L., Skafnesmo, K. O., & Wargelius, A. (2014).  
801 Targeted mutagenesis in Atlantic salmon (*Salmo salar* L.) using the CRISPR/Cas9  
802 system induces complete knockout individuals in the F0 generation. *PloS one*, 9,  
803 e108622. <https://doi.org/10.1371/journal.pone.0108622>
- 804 Elfstrom, C. M., Smith, C. T., & Seeb, L. W. (2007). Thirty - eight single nucleotide  
805 polymorphism markers for high - throughput genotyping of chum salmon.  
806 *Molecular Ecology Notes*, 7, 1211–1215. [https://doi.org/10.1111/j.1471-](https://doi.org/10.1111/j.1471-8286.2007.01835.x)  
807 [8286.2007.01835.x](https://doi.org/10.1111/j.1471-8286.2007.01835.x)
- 808 Fleming, I. A., Hindar, K., MjÖlnerÖd, I. B., Jonsson, B., Balstad, T., & Lamberg, A.  
809 (2000). Lifetime success and interactions of farm salmon invading a native



- 810 population. *Proceedings of the Royal Society of London B*, 267, 1517–1523. doi:  
811 10.1098/rspb.2000.1173
- 812 Fields, P. A., & Somero, G. N. (1998). Hot spots in cold adaptation: localized increases in  
813 conformational flexibility in lactate dehydrogenase A4 orthologs of Antarctic  
814 notothenioid fishes. *Proceedings of the National Academy of Sciences*, 95, 11476–  
815 11481. <https://doi.org/10.1073/pnas.95.19.11476>
- 816 Ferchaud, A. L., Laporte, M., Perrier, C., & Bernatchez, L. (2018). Impact of  
817 supplementation on deleterious mutation distribution in an exploited salmonid.  
818 *Evolutionary Applications*, 11, 1053–1065. <https://doi.org/10.1111/eva.12660>
- 819 Garvin, M. R., Saitoh, K., Churikov, D. Y., Brykov, V. A., & Gharrett, A. J. (2010). Single  
820 nucleotide polymorphisms in chum salmon (*Oncorhynchus keta*) mitochondrial  
821 DNA derived from restriction site haplotype information. *Genome*, 53, 501–507.  
822 <https://doi.org/10.1139/G10-026>
- 823 Garvin, M. R., Kondzela, C. M., Martin, P. C., Finney, B., Guyon, J., Templin, W. D., ... &  
824 Gharrett, A. J. (2013). Recent physical connections may explain weak genetic  
825 structure in western Alaskan chum salmon (*Oncorhynchus keta*) populations.  
826 *Ecology and Evolution*, 3, 2362–2377. <https://doi.org/10.1002/ece3.628>
- 827 Gharrett, A. J., & Smoker, W. W. (1993). A perspective on the adaptive importance of  
828 genetic infrastructure in salmon populations to ocean ranching in Alaska. *Fisheries*  
829 *Research*, 18, 45–58. [https://doi.org/10.1016/0165-7836\(93\)90039-A](https://doi.org/10.1016/0165-7836(93)90039-A)
- 830 Govoni, J. J., Boehlert, G. W., & Watanabe, Y. (1986). The physiology of digestion in fish  
831 larvae. *Environmental Biology of Fishes* 16, 59–77. [https://doi.org/10.1007/978-94-  
832 017-1158-6\\_5](https://doi.org/10.1007/978-94-017-1158-6_5)
- 833 Hagen, I. J., Jensen, A. J., Bolstad, G. H., Diserud, O. H., Hindar, K., Lo, H., & Karlsson,  
834 S. (2019). Supplementary stocking selects for domesticated genotypes. *Nature*  
835 *Communications*, 10, 199. <https://doi.org/10.1038/s41467-018-08021-z>
- 836 Iida, M., Yoshino, K., & Katayama, S. (2018). Current status of natural spawning of chum  
837 salmon *Oncorhynchus keta* in rivers with or without hatchery stocking on the Japan  
838 Seaside of northern Honshu, Japan. *Fisheries Science*, 84, 453–459.  
839 <https://doi.org/10.1007/s12562-018-1192-7>
- 840 Ishida, Y., Ito, S. O., Kaeriyama, M., McKinnell, S., & Nagasawa, K. (1993). Recent  
841 changes in age and size of chum salmon (*Oncorhynchus keta*) in the North Pacific  
842 Ocean and possible causes. *Canadian Journal of Fisheries and Aquatic Sciences* 50,  
843 290–295. <https://doi.org/10.1139/f93-033>
- 844 Kaeriyama, M. (1998). Dynamics of chum salmon, *Oncorhynchus keta*, populations  
845 released from Hokkaido, Japan. *North Pacific Anadromous Fish Commission*  
846 *Bulletin*, 1, 90–102. Available at <https://npafc.org>
- 847 Kaeriyama, M., & Qin, Y. (2014). Biological interactions between wild and hatchery-  
848 produced Pacific salmon. In P. T. K. Woo and D. J. Noakes (Eds.), *Salmon* (pp. 223–  
849 238). New York, USA: Nova Science Publisher.
- 850 Karabanov, D. P. & Kodukhova, Y. V. (2018). Biochemical polymorphism and intraspecific  
851 structure in populations of Kilka *Clupeonella cultriventris* (Nordmann, 1840) from  
852 natural and invasive parts of its range. *Inland Water Biology*, 11, 496–500.  
853 <https://doi.org/10.1134/S1995082918040107>
- 854 Kijima, A., & Fujio, Y. (1979). Geographical distribution of IDH and LDH isozymes in  
855 chum salmon population. *Nippon Suisan Gakkaishi*, 45, 287–295. (In Japanese with  
856 English abstract) <https://doi.org/10.2331/suisan.45.287>

- 857 Kitada, S. (2014). Japanese chum salmon stock enhancement: current perspective and  
858 future challenges. *Fisheries Science*, 80, 237–249. [https://doi.org/10.1007/s12562-](https://doi.org/10.1007/s12562-013-0692-8)  
859 [013-0692-8](https://doi.org/10.1007/s12562-013-0692-8)
- 860 Kitada, S. (2018). Economic, ecological and genetic impacts of marine stock enhancement  
861 and sea ranching: A systematic review. *Fish and Fisheries*, 19, 511–532.  
862 <https://doi.org/10.1111/faf.12271>
- 863 Kitada, S. (2020). Lessons from Japan marine stock enhancement and sea ranching  
864 programmes over 100 years. *Reviews in Aquaculture*.  
865 <https://doi.org/10.1111/raq.12418>
- 866 Kitada, S., Nakamichi, R., & Kishino, H. (2017). The empirical Bayes estimators of fine  
867 scale population structure in high gene flow species. *Molecular Ecology Resources*,  
868 17, 1210–1222. <https://doi.org/10.1111/1755-0998.12663>
- 869 Kitada, S., Nakamichi, R., & Kishino, H. (2020). Understanding population structure in an  
870 evolutionary context: population-specific  $F_{ST}$  and pairwise  $F_{ST}$ . *bioRxiv*  
871 <https://doi.org/10.1101/2020.01.30.927186>
- 872 Kitada, S., Nakajima, K., Hamasaki, K., Shishidou, H., Waples, R., & Kishino, H. (2019).  
873 Rigorous monitoring of a large-scale marine stock enhancement program  
874 demonstrates the need for comprehensive management of fisheries and nursery  
875 habitat. *Scientific Reports*, 9, 5290. <https://doi.org/10.1038/s41598-019-39050-3>
- 876 Kobayashi, T. (1980). Salmon ranching in Japan. In J. E. Thorpe (Ed.), *Salmon Ranching*  
877 (pp. 91–107). London, UK: Academic Press.
- 878 Kobayashi, T., & Ohkuma, K. (1983). On the device for stamina measurement of salmon  
879 fry. *Scientific Reports of the Hokkaido Salmon Hatchery*, 37, 41–44. (in Japanese)  
880 <http://salmon.fra.affrc.go.jp/kankobutu/srhsh/data/srhsh297.htm>
- 881 Kong, M., Xiang, H., Wang, J., Liu, J., Zhang, X., & Zhao, X. (2020). Mitochondrial DNA  
882 Haplotypes Influence Energy Metabolism across Chicken Transmitochondrial  
883 Cybrids. *Genes*, 11, 100. <https://doi.org/10.3390/genes11010100>
- 884 Koyano, H., & Kishino, H. (2010). Quantifying biodiversity and asymptotics for a  
885 sequence of random strings. *Physical Review E*, 81, 061912.  
886 <https://doi.org/10.1103/PhysRevE.81.061912>
- 887 Laikre, L., Schwartz, M. K., Waples, R. S., Ryman, N., & GeM Working Group. (2010).  
888 Compromising genetic diversity in the wild: unmonitored large-scale release of  
889 plants and animals. *Trends in Ecology & Evolution*, 25, 520–529.  
890 <https://doi.org/10.1016/j.tree.2010.06.013>
- 891 Le Luyer, J., Laporte, M., Beacham, T. D., Kaukinen, K. H., Withler, R. E., Leong, J. S., ...  
892 & Bernatchez, L. (2017). Parallel epigenetic modifications induced by hatchery  
893 rearing in a Pacific salmon. *Proceedings of the National Academy of Sciences*, 114,  
894 12964–12969. <https://doi.org/10.1073/pnas.1711229114>
- 895 Luikart, G., England, P. R., Tallmon, D., Jordan, S., & Taberlet, P. (2003). The power and  
896 promise of population genomics: from genotyping to genome typing. *Nature*  
897 *Reviews Genetics*, 4, 981–994. <https://doi.org/10.1038/nrg1226>
- 898 Mayama, H., & Ishida, Y. (2003). Japanese studies on the early ocean life of juvenile  
899 salmon. *North Pacific Anadromous Fish Commission Bulletin*, 3, 41–67. Available  
900 at <https://npafc.org>
- 901 McConnell, C. J., Westley, P. A., & McPhee, M. V. (2018). Differences in fitness-  
902 associated traits between hatchery and wild chum salmon despite long-term  
903 immigration by strays. *Aquaculture Environment Interactions*, 10: 99–113.  
904 <https://doi.org/10.3354/aei00261>

- 905 McGinnity, P., Prodöhl, P., Ferguson, A., Hynes, R., ó Maoiléidigh, N., Baker, N., ... &  
906 Taggart, J. (2003). Fitness reduction and potential extinction of wild populations of  
907 Atlantic salmon, *Salmo salar*, as a result of interactions with escaped farm salmon.  
908 *Proceedings of the Royal Society of London B*, 270, 2443–2450. doi:  
909 10.1098/rspb.2003.2520
- 910 McPhail, J. D. (1997). The origin and speciation of *Oncorhynchus* revisited. In D. J.  
911 Stouder, P. A. Bisson, & R. J. Naiman (Eds.), *Pacific Salmon and their Ecosystems*  
912 (pp. 29–38). Boston, USA: Springer.
- 913 Merritt, R. B. (1972). Geographic distribution and enzymatic properties of lactate  
914 dehydrogenase allozymes in the fathead minnow, *Pimephales promelas*. *American*  
915 *Naturalists*, 106, 173–184. <https://doi.org/10.1086/282760>
- 916 Miyakoshi, Y., Urabe, H., Saneyoshi, H., Aoyama, T., Sakamoto, H., Ando, D., ... &  
917 Nagata, M. (2012). The occurrence and run timing of naturally spawning chum  
918 salmon in northern Japan. *Environmental Biology of Fishes*, 94, 197–206.  
919 <https://doi.org/10.1007/s10641-011-9872-5>
- 920 Miyakoshi, Y., Nagata, M., Kitada, S., & Kaeriyama, M. (2013). Historical and current  
921 hatchery programs and management of chum salmon in Hokkaido, northern Japan.  
922 *Reviews in Fisheries Science*, 21, 469–479.  
923 <https://doi.org/10.1080/10641262.2013.836446>
- 924 Montgomery, D. R. (2000). Coevolution of the Pacific salmon and Pacific Rim  
925 topography. *Geology*, 28, 1107–1110. [https://doi.org/10.1130/0091-](https://doi.org/10.1130/0091-7613(2000)28<1107:COTPSA>2.0.CO;2)  
926 [7613\(2000\)28<1107:COTPSA>2.0.CO;2](https://doi.org/10.1130/0091-7613(2000)28<1107:COTPSA>2.0.CO;2)
- 927 Morita, K., Saito, T., Miyakoshi, Y., Fukuwaka, M. A., Nagasawa, T., & Kaeriyama, M.  
928 (2006). A review of Pacific salmon hatchery programmes on Hokkaido Island, Japan.  
929 *ICES Journal of Marine Science*, 63, 1353–1363.  
930 <https://doi.org/10.1016/j.icesjms.2006.03.024>
- 931 Morita, K., Takahashi, S., Ohkuma, K., & Nagasawa, T. (2013). Estimation of the  
932 proportion of wild chum salmon *Oncorhynchus keta* in Japanese hatchery rivers.  
933 *Nippon Suisan Gakkaishi*, 79, 206–213. (in Japanese with English abstract)  
934 <https://doi.org/10.2331/suisan.79.206>
- 935 Myers, K. W., Klovach, N. V., Gritsenko, O. F., Urawa, S., & Royer, T. C. (2007). Stock-  
936 specific distributions of Asian and North American salmon in the open ocean,  
937 interannual changes, and oceanographic conditions. *North Pacific Anadromous Fish*  
938 *Commission Bulletin*, 4, 159–177. Available at <https://npafc.org>
- 939 Naish, K. A., Taylor III, J. E., Levin, P. S., Quinn, T. P., Winton, J. R., Huppert, D., &  
940 Hilborn, R. (2007). An evaluation of the effects of conservation and fishery  
941 enhancement hatcheries on wild populations of salmon. *Advances in Marine*  
942 *Biology*, 53, 61–194. [https://doi.org/10.1016/S0065-2881\(07\)53002-6](https://doi.org/10.1016/S0065-2881(07)53002-6)
- 943 Nei, M., & Tajima, F. (1981). DNA polymorphism detectable by restriction endonucleases.  
944 *Genetics*, 97, 145–163. <https://www.genetics.org/content/97/1/145>
- 945 Nei, M., & Chesser, R. K. (1983). Estimation of fixation indices and gene diversities.  
946 *Annals of Human Genetics*, 47, 253–259. [https://doi.org/10.1111/j.1469-](https://doi.org/10.1111/j.1469-1809.1983.tb00993.x)  
947 [1809.1983.tb00993.x](https://doi.org/10.1111/j.1469-1809.1983.tb00993.x)
- 948 Nielsen, E. E., Hemmer-Hansen, J., Larsen, P. F., & Bekkevold, D. (2009). Population  
949 genomics of marine fishes: identifying adaptive variation in space and time.  
950 *Molecular Ecology*, 18, 3128–3150. [https://doi.org/10.1111/j.1365-](https://doi.org/10.1111/j.1365-294X.2009.04272.x)  
951 [294X.2009.04272.x](https://doi.org/10.1111/j.1365-294X.2009.04272.x)

- 952 Nielsen, R., Bustamante, C., Clark, A. G., Glanowski, S., Sackton, T. B., Hubisz, M. J., ...  
953 & Sninsky, J. J. (2005). A scan for positively selected genes in the genomes of  
954 humans and chimpanzees. *PLoS Biol*, 3, e170.  
955 <https://doi.org/10.1371/journal.pbio.0030170>
- 956 Nicholls, T. J., & Minczuk, M. (2014). In D-loop: 40 years of mitochondrial 7S DNA.  
957 *Experimental Gerontology*, 56, 175–181.  
958 <https://doi.org/10.1016/j.exger.2014.03.027>
- 959 Nishimura, T., Motoi, M., Niri, Y., Hoshi, Y., Kondo, R., & Watanuki, S. (2012).  
960 Relationship between seasonal cold acclimatization and mtDNA haplogroup in  
961 Japanese. *Journal of Physiological Anthropology*, 31, 1-10.  
962 <https://doi.org/10.1186/1880-6805-31-22>
- 963 North Pacific Anadromous Fish Commission. (2020). *NPAFC Pacific salmonid catch*  
964 *statistics (updated summer 2020)*, NPAFC, Vancouver. Retrieved from  
965 <http://https.npafc.org>
- 966 Okazaki, T. (1982) Geographical distribution of allelic variations of enzymes in chum  
967 salmon *Oncorhynchus keta*, river populations of Japan and the effects of  
968 transplanted. *Nippon Suisan Gakkaishi*, 48, 1525–1535.  
969 <https://doi.org/10.2331/suisan.48.1525>
- 970 Olsen, J. B., Flannery, B. G., Beacham, T. D., Bromaghin, J. F., Crane, P. A., Lean, C. F., ...  
971 & Wenburg, J. K. (2008). The influence of hydrographic structure and seasonal run  
972 timing on genetic diversity and isolation-by-distance in chum salmon  
973 (*Oncorhynchus keta*). *Canadian Journal of Fisheries and Aquatic Sciences*, 65,  
974 2026–2042. <https://doi.org/10.1139/F08-108>
- 975 Ozerov, M. Y., Gross, R., Bruneaux, M., Vähä, J. P., Burimski, O., Pukk, L., & Vasemägi,  
976 A. (2016). Genomewide introgressive hybridization patterns in wild Atlantic  
977 salmon influenced by inadvertent gene flow from hatchery releases. *Molecular*  
978 *Ecology*, 25, 1275–1293. <https://doi.org/10.1111/mec.13570>
- 979 Park, L. K., Brainard, M. A., Dightman, D. A., & Winans, G. A. (1993). Low levels of  
980 intraspecific variation in the mitochondrial DNA of chum salmon (*Oncorhynchus*  
981 *keta*). *Molecular Marine Biology and Biotechnology*, 2, 362–370. PMID: 7910770
- 982 Petrou, E. L., Seeb, J. E., Hauser, L., Witteveen, M. J., Templin, W. D., & Seeb, L. W.  
983 (2014). Fine-scale sampling reveals distinct isolation by distance patterns in chum  
984 salmon (*Oncorhynchus keta*) populations occupying a glacially dynamic  
985 environment. *Conservation Genetics*, 15, 229–243. DOI:10.1007/s10592-013-  
986 0534-3
- 987 Powers, D. A., Lauerman, T., Crawford, D., & DiMichele, L. (1991). Genetic mechanisms  
988 for adapting to a changing environment. *Annual Review of Genetics*, 25, 629–660.  
989 <https://doi.org/10.1146/annurev.ge.25.120191.003213>
- 990 Prado-Martinez, J., Sudmant, P. H., Kidd, J. M., Li, H., Kelley, J. L., Lorente-Galdos, B., ...  
991 & Cagan, A. (2013). Great ape genetic diversity and population history. *Nature*, 499,  
992 471–475. <https://doi.org/10.1038/nature12228>
- 993 Reisenbichler, R. R., & McIntyre, J. D. (1977). Genetic differences in growth and survival  
994 of juvenile hatchery and wild steelhead trout, *Salmo gairdneri*. *Journal of the*  
995 *Fisheries Board of Canada*, 34, 123–128. <https://doi.org/10.1139/f77-015>
- 996 Reisenbichler, R. R., & Rubin, S. P. (1999). Genetic changes from artificial propagation of  
997 Pacific salmon affect the productivity and viability of supplemented populations.  
998 *ICES Journal of Marine Science*, 56, 459–466.  
999 <https://doi.org/10.1006/jmsc.1999.0455>



- 1000 Rousset, F. (2008). Genepop'007: a complete reimplementation of the Genepop software  
1001 for Windows and Linux. *Molecular Ecology Resources*, 8, 103–106.  
1002 <https://doi.org/10.1111/j.1471-8286.2007.01931.x>
- 1003 Ruggerson, G. T., & Irvine, J. R. (2018). Numbers and biomass of natural - and  
1004 hatchery - origin pink salmon, chum salmon, and sockeye salmon in the north  
1005 Pacific Ocean, 1925–2015. *Marine and Coastal Fisheries*, 10, 152–168.  
1006 <https://doi.org/10.1002/mcf2.10023>
- 1007 Saitou, N. & Nei, M. (1987). The neighbor-joining method: a new method for  
1008 reconstructing phylogenetic trees. *Molecular Biology and Evolution*, 4, 406–425.  
1009 <https://doi.org/10.1093/oxfordjournals.molbev.a040454>
- 1010 Sasaki, H. (2018). Field surveys of juvenile chum salmon *Oncorhynchus keta* salmon in  
1011 Toyohira River, *Hokkaido*. *Sapporo Salmon Museum Kenkyu Hokoku*, 14–22. (in  
1012 Japanese) Available at [https://salmon-museum.jp/document/research\\_report](https://salmon-museum.jp/document/research_report)
- 1013 Sato, S., Kojima, H., Ando, J., Ando, H., Wilmot, R. L., Seeb, L. W., ... & Urawa, S.  
1014 (2004). Genetic population structure of chum salmon in the Pacific Rim inferred  
1015 from mitochondrial DNA sequence variation. *Environmental Biology of Fishes*, 69,  
1016 37–50. <https://doi.org/10.1023/B:EBFI.0000022881.90237.aa>
- 1017 Sato, S., Templin, W. D., Seeb, L. W., Seeb, J. E., & Urawa, S. (2014). Genetic structure  
1018 and diversity of Japanese chum salmon populations inferred from single nucleotide  
1019 polymorphism markers. *Transactions of the American Fisheries Society*, 143, 1231–  
1020 1246. <https://doi.org/10.1080/00028487.2014.901251>
- 1021 Sato, S., & Urawa, S. (2015). Genetic structure of chum salmon populations in Japan.  
1022 *Bulletin of Fishery Research Agency*, 39, 21–470. (in Japanese with English abstract)  
1023 Available at <http://www.fra.affrc.go.jp/bulletin/thesis.html#bull>
- 1024 Seeb, L. W., Crane, P. A. & Gates, R. B. (1995). *Progress Report of Genetic Studies of*  
1025 *Pacific Rim Chum Salmon, and Preliminary Analysis of the 1993 and 1994 South*  
1026 *Unimak June Fisheries*. Anchorage, USA: Alaska Department of Fish and Game.  
1027 <http://www.adfg.alaska.gov/fedaidpdfs/rir.5j.1995.07.pdf>
- 1028 Seeb, L. W., & Crane, P. A. (1999). High genetic heterogeneity in chum salmon in western  
1029 Alaska, the contact zone between northern and southern lineages. *Transactions of the*  
1030 *American Fisheries Society*, 128, 58–87. [https://doi.org/10.1577/1548-](https://doi.org/10.1577/1548-8659(1999)128<0058:HGHICS>2.0.CO;2)  
1031 [8659\(1999\)128<0058:HGHICS>2.0.CO;2](https://doi.org/10.1577/1548-8659(1999)128<0058:HGHICS>2.0.CO;2)
- 1032 Seeb, L. W., Templin, W. D., Sato, S., Abe, S., Warheit, K., Park, J. Y., & Seeb, J. E.  
1033 (2011). Single nucleotide polymorphisms across a species' range: implications for  
1034 conservation studies of Pacific salmon. *Molecular Ecology Resources*, 11, 195–217.  
1035 <https://doi.org/10.1111/j.1755-0998.2010.02966.x>
- 1036 Shaklee, J. B., Allendorf, F. W., Morizot, D. C., & Whitt, G. S. (1990). Gene nomenclature  
1037 for protein-coding loci in fish. *Transactions of the American Fisheries Society*, 119,  
1038 2–15. [https://doi.org/10.1577/1548-8659\(1990\)119<0002:GNFPLI>2.3.CO;2](https://doi.org/10.1577/1548-8659(1990)119<0002:GNFPLI>2.3.CO;2)
- 1039 Shimizu, T., Ban, M., Miyauchi, Y., Umeda, K., Nakano, K., Fujii, M., & Mayama, H.  
1040 (2016). Nutritional condition of hatchery and wild chum salmon *Oncorhynchus keta*  
1041 fry migrating down the Chitose River. *Journal of Fisheries Technology*, 8, 89–94. (in  
1042 Japanese with English abstract) Available at  
1043 [http://www.fra.affrc.go.jp/bulletin/fish\\_tech/index.html](http://www.fra.affrc.go.jp/bulletin/fish_tech/index.html)
- 1044 Small, M. P., Rogers Olive, S. D., Seeb, L. W., Seeb, J. E., Pascal, C. E., Warheit, K. I., &  
1045 Templin, W. (2015). Chum salmon genetic diversity in the northeastern Pacific  
1046 Ocean assessed with single nucleotide polymorphisms (SNPs): Applications to



- 1047 fishery management. *North American Journal of Fisheries Management*, 35, 974–  
1048 987. <https://doi.org/10.1080/02755947.2015.1055014>
- 1049 Smith, C. T., Elfstrom, C. M., Seeb, L. W., & Seeb, J. E. (2005). Use of sequence data from  
1050 rainbow trout and Atlantic salmon for SNP detection in Pacific salmon. *Molecular*  
1051 *Ecology*, 14, 4193–4203. <https://doi.org/10.1111/j.1365-294X.2005.02731.x>
- 1052 Somero, G. N. (2004). Adaptation of enzymes to temperature: searching for basic  
1053 “strategies”. *Comparative Biochemistry and Physiology Part B: Biochemistry and*  
1054 *Molecular Biology*, 139, 321–333. <https://doi.org/10.1016/j.cbpc.2004.05.003>
- 1055 Somero, G. N. (2010). The physiology of climate change: how potentials for  
1056 acclimatization and genetic adaptation will determine ‘winners’ and ‘losers’. *Journal*  
1057 *of Experimental Biology*, 213, 912–920. doi: 10.1242/jeb.037473
- 1058 Tanaka, H., Takagi, Y., & Naito, Y. (2000). Behavioural thermoregulation of chum salmon  
1059 during homing migration in coastal waters. *Journal of Experimental Biology* 203,  
1060 1825–1833. <https://jeb.biologists.org/content/203/12/1825>
- 1061 Taylor, E. B., Beacham, T. D., & Kaeriyama, M. (1994). Population structure and  
1062 identification of North Pacific Ocean chum salmon (*Oncorhynchus keta*) revealed by  
1063 an analysis of minisatellite DNA variation. *Canadian Journal of Fisheries and*  
1064 *Aquatic Sciences*, 51, 1430–1442. <https://doi.org/10.1139/f94-143>
- 1065 Tillotson, M. D., Barnett, H. K., Bhuthimethee, M., Koehler, M. E., & Quinn, T. P. (2019).  
1066 Artificial selection on reproductive timing in hatchery salmon drives a phenological  
1067 shift and potential maladaptation to climate change. *Evolutionary applications*, 12,  
1068 1344–1359. <https://doi.org/10.1111/eva.12730>
- 1069 Urawa, S., Azumaya, T., Crane, P. A., & Seeb, L. W. (2005). Origins and distribution of  
1070 chum salmon in the central Bering Sea. *North Pacific Anadromous Fish Commission*  
1071 *Technical Report*, 6, 67–70.
- 1072 Urawa, S., Sato, S., Crane, P. A., Agler, B., Josephson, R., & Azumaya, T. (2009). Stock-  
1073 specific ocean distribution and migration of chum salmon in the Bering Sea and  
1074 North Pacific Ocean. *North Pacific Anadromous Fish Commission Bulletin*, 5, 131–  
1075 146. Available at <https://npafc.org>
- 1076 Valiquette, E., Perrier, C., Thibault, I., & Bernatchez, L. (2014). Loss of genetic integrity in  
1077 wild lake trout populations following stocking: insights from an exhaustive study of  
1078 72 lakes from Québec, Canada. *Evolutionary Applications*, 7, 625–644.  
1079 <https://doi.org/10.1111/eva.12160>
- 1080 Waples, R. S. (1991). Genetic interactions between hatchery and wild salmonids: Lessons  
1081 from the Pacific Northwest. *Canadian Journal of Fisheries and Aquatic Sciences*,  
1082 48(S1), 124–133. <https://doi.org/10.1139/f91-311>
- 1083 Waples, R. S. (1999). Dispelling some myths about hatcheries. *Fisheries*, 24, 12–21.  
1084 [https://doi.org/10.1577/1548-8446\(1999\)024<0012:DSMAH>2.0.CO;2](https://doi.org/10.1577/1548-8446(1999)024<0012:DSMAH>2.0.CO;2)
- 1085 Waples, R. S., & Drake, J. (2004). Risk/benefit considerations for marine stock  
1086 enhancement: A Pacific salmon perspective. In K. Leber, S. Kitada, H. L.  
1087 Blankenship, & T. Svåsand (Eds.), *Stock enhancement and sea ranching,*  
1088 *developments pitfalls and opportunities* (pp. 260–306). Oxford, UK: Blackwell.
- 1089 Waples, R. S., & Gaggiotti, O. (2006). What is a population? An empirical evaluation of  
1090 some genetic methods for identifying the number of gene pools and their degree of  
1091 connectivity. *Molecular Ecology*, 15, 1419–1439. [https://doi.org/10.1111/j.1365-](https://doi.org/10.1111/j.1365-294X.2006.02890.x)  
1092 [294X.2006.02890.x](https://doi.org/10.1111/j.1365-294X.2006.02890.x)

- 1093 Waples, R. S., Pess, G. R., & Beechie, T. (2008). Evolutionary history of Pacific salmon in  
1094 dynamic environments. *Evolutionary Applications*, 1, 189–206.  
1095 <https://doi.org/10.1111/j.1752-4571.2008.00023.x>
- 1096 Waples, R. S., Naish, K. A., & Primmer, C. R. (2020). Conservation and Management of  
1097 Salmon in the Age of Genomics. *Annual Review of Animal Biosciences*, 8, 117–143.  
1098 <https://doi.org/10.1146/annurev-animal-021419-083617>
- 1099 Weir, B. S., & Cockerham, C. C. (1984). Estimating *F*-statistics for the analysis of  
1100 population structure. *Evolution*, 38, 1358–1370. DOI: 10.2307/2408641
- 1101 Wilmot, R. L., Everett, R. J., Spearman, W. J., Baccus, R., Varnavskaya, N. V., & Putivkin,  
1102 S. V. (1994). Genetic stock structure of western Alaska chum salmon and a  
1103 comparison with Russian Far East stocks. *Canadian Journal of Fisheries and*  
1104 *Aquatic Sciences*, 51(S1), 84–94. <https://doi.org/10.1139/f94-297>
- 1105 Winans, G. A., Aebersold, P. B., Urawa, S., & Varnavskaya, N. V. (1994). Determining  
1106 continent of origin of chum salmon (*Oncorhynchus keta*) using genetic stock  
1107 identification techniques: status of allozyme baseline in Asia. *Canadian Journal of*  
1108 *Fisheries and Aquatic Sciences*, 51(S1), 95–113. <https://doi.org/10.1139/f94-298>
- 1109 Yoon, M., Sato, S., Seeb, J. E., Brykov, V., Seeb, L. W., Varnavskaya, N. V., ... & Abe, S.  
1110 (2008). Mitochondrial DNA variation and genetic population structure of chum  
1111 salmon *Oncorhynchus keta* around the Pacific Rim. *Journal of Fish Biology*, 73,  
1112 1256–1266. <https://doi.org/10.1111/j.1095-8649.2008.01995.x>

1113

#### 1114 **SUPPORTING INFORMATION**

1115 Additional supporting information may be found online in the Supporting Information  
1116 section.

1117

**Table 1.** Linear regression of chum salmon catches on sea surface temperature (SST) anomalies (1996–2019)

| SST <sup>a</sup>          | Estimate <sup>c</sup> | SE   | <i>t</i> | <i>p</i>     | <i>r</i>     | <i>R</i> <sup>2</sup> |
|---------------------------|-----------------------|------|----------|--------------|--------------|-----------------------|
| Spring                    | -17.4                 | 4.95 | -3.5     | <b>0.002</b> | <b>-0.59</b> | 0.36                  |
| Summer                    | -11.0                 | 3.50 | -3.1     | <b>0.005</b> | <b>-0.55</b> | 0.31                  |
| Autumn                    | -8.6                  | 7.34 | -1.2     | 0.253        | -0.24        | 0.02                  |
| Winter                    | -11.4                 | 6.77 | -1.6     | 0.108        | -0.33        | 0.11                  |
| Spring (2-5) <sup>b</sup> | -2.8                  | 11.9 | -0.2     | 0.815        | -0.05        | 0.00                  |
| Summer (2-5) <sup>b</sup> | -20.9                 | 4.65 | -4.5     | <b>0.000</b> | <b>-0.69</b> | 0.48                  |

*Note:* <sup>a</sup>Spring: April–June; Summer: July–September; Autumn: October–December; Winter: January–March. <sup>b</sup>Average of SST values 2 to 5 years before year of return, corresponding to juveniles. <sup>c</sup>Intercept values not shown. Data given in Table S3 in Supplemental Data.

1118

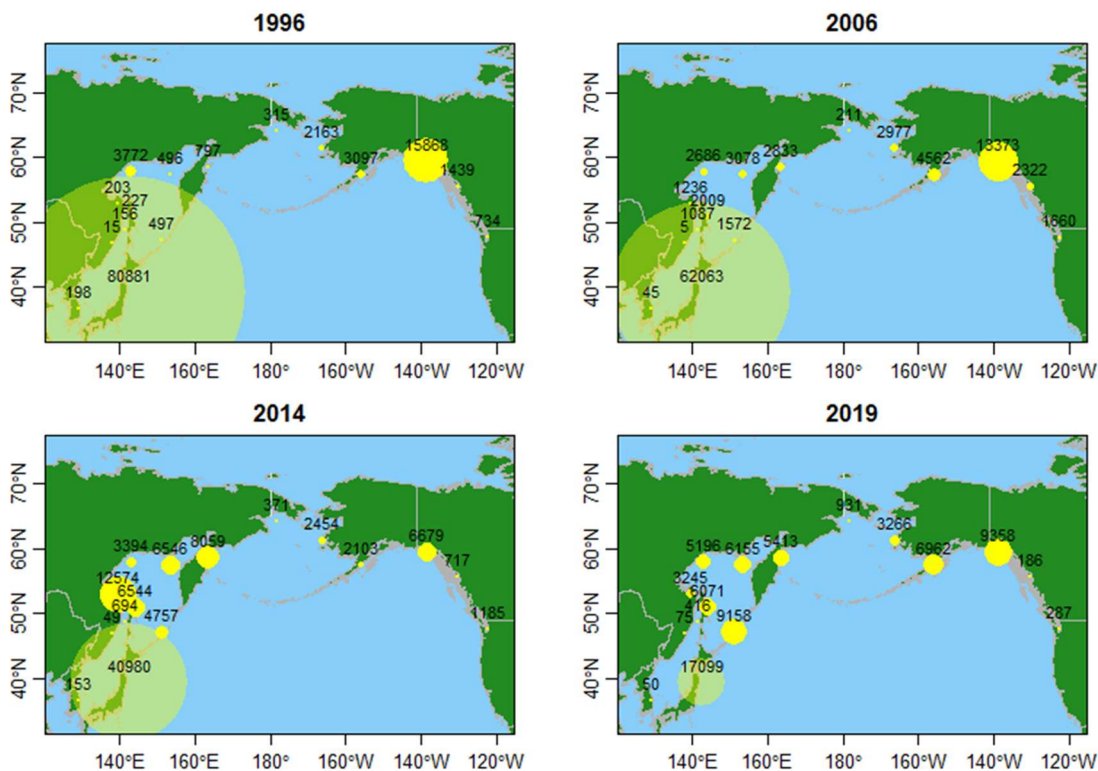

1119  
1120  
1121  
1122  
1123  
1124  
1125

**FIGURE 1** Changes in the chum salmon catch in the North Pacific over recent decades. Numbers (in thousands) are shown for 1996—the year of historical maxima in the North Pacific (117 million fish) and Japan (81 million fish)—and 2006, 2014 and 2019. Circle sizes are proportional to the number of salmon. Data are from the North Pacific Anadromous Fish Commission ([www.npafc.org](http://www.npafc.org), accessed January 2020; NPAFC, 2020) and given in Supporting Information Table S1.

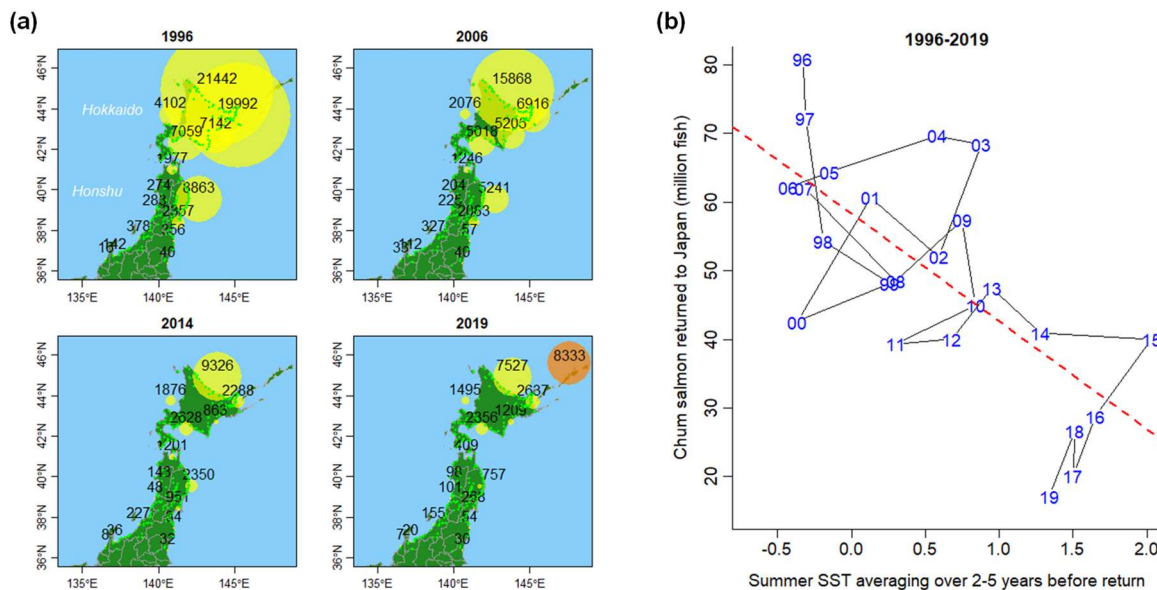

1126  
1127  
1128  
1129  
1130  
1131  
1132  
1133  
1134

**FIGURE 2** Changes in the number of chum salmon returning to Japan and sea surface temperatures (SSTs). (a) Numbers (in thousands) are shown for 1996 (the historical maximum catch year), 2006, 2014 and 2019 (including the catch on Iturup Island, Russia). Circle sizes are proportional to the number of salmon. Green dots show salmon hatcheries. Data are given in Supporting Information Table S2. (B) Mean SST anomalies in summer 2 to 5 years before return in Hokkaido and northern Honshu vs. the number of adult fish returning to Japan (Table 1). The dashed line shows the estimated regression line. Data are given in Supporting Information Table S3.



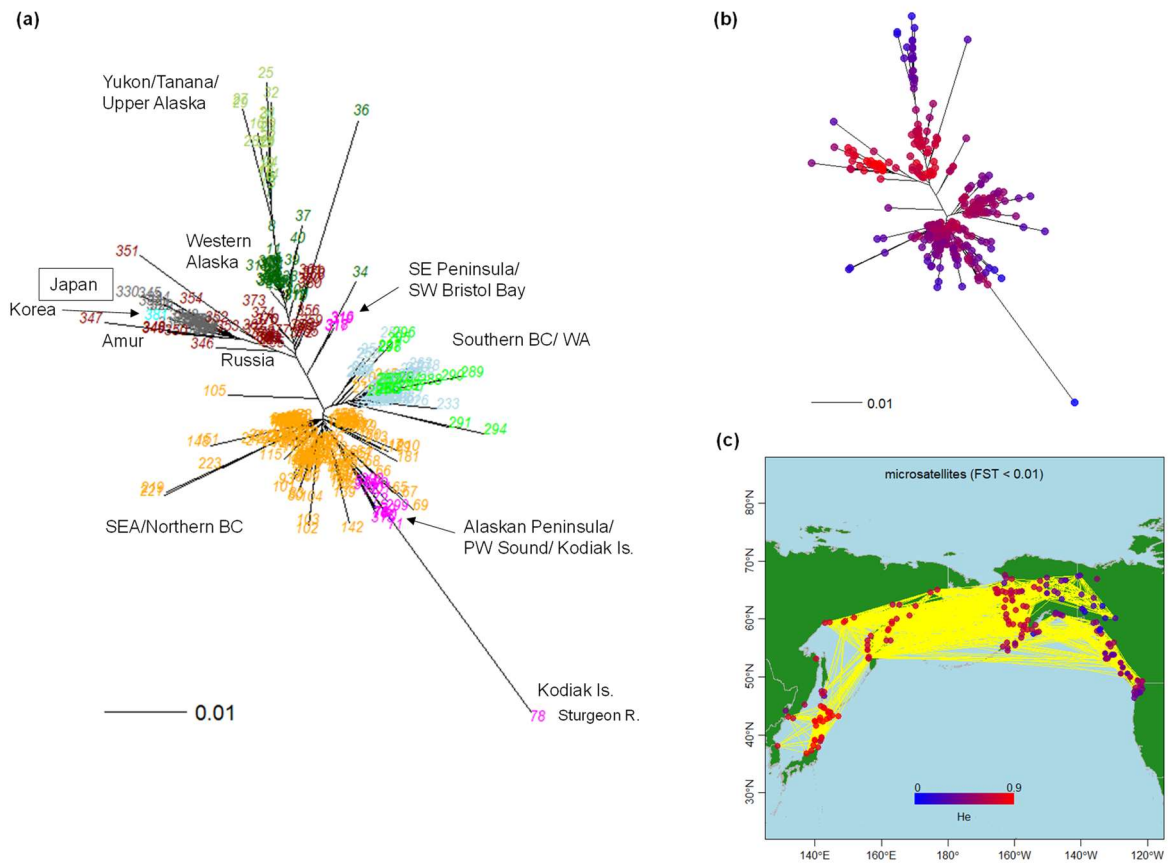

1135

1136

1137

1138

1139

1140

1141

1142

1143

1144

**FIGURE 3** Population structure and genetic diversity of chum salmon based on microsatellite markers. (a) Unrooted NJ tree based on pairwise  $F_{ST}$  values estimated from 14 microsatellite loci of 381 populations ( $n = 51,355$ ) (Beacham et al., 2009). (b) Unrooted NJ tree based on pairwise  $F_{ST}$  values overlaid with  $H_e$  values. The color of each population reflects the magnitude of  $H_e$  values. (c) Visualization of genetic diversity and population connectivity. Populations connected by yellow lines are those with pairwise  $F_{ST} < 0.01$ . Detailed sampling locations and  $H_e$  values are given in Supporting Information Table S4.

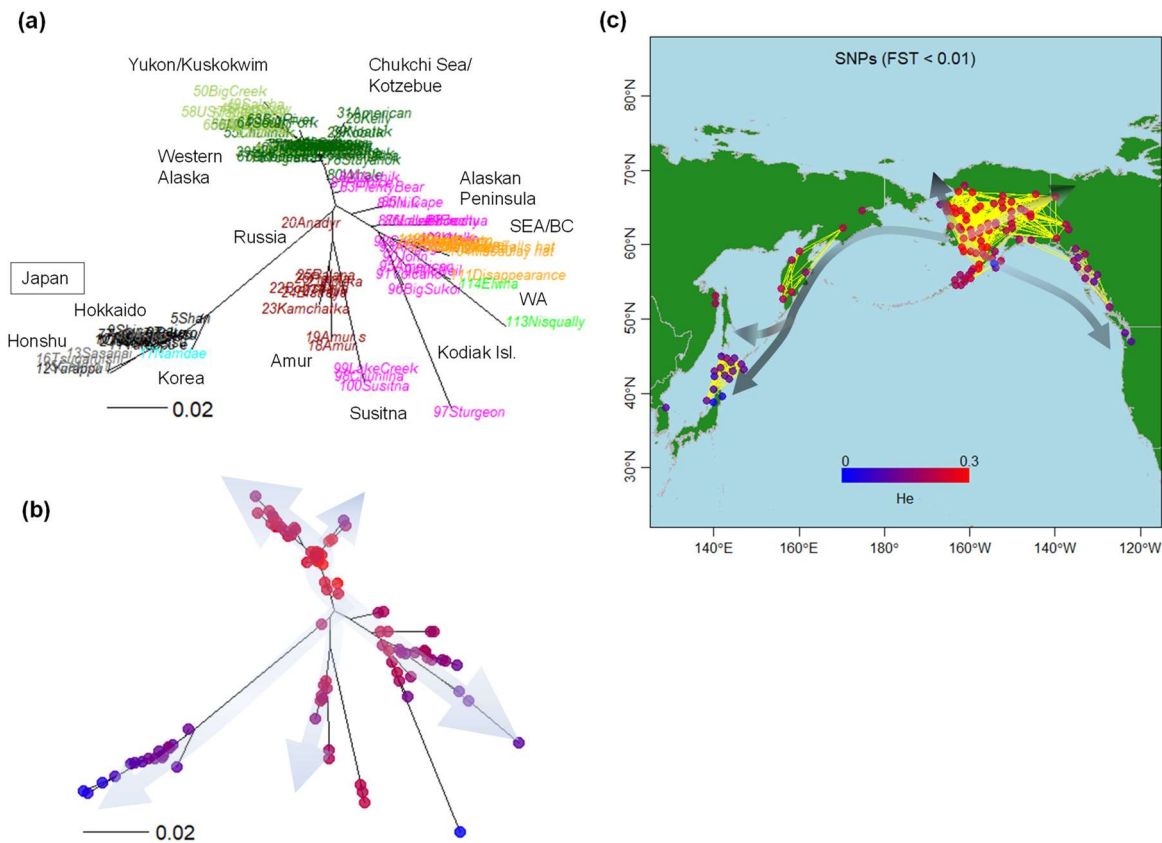

1145

1146

1147

1148 **FIGURE 4** Population structure and genetic diversity of chum salmon based on SNP

1149 genotypes. (a) Unrooted NJ tree based on pairwise  $F_{ST}$  estimated from 53 loci of 114

1150 populations ( $n = 10,458$ ) (Seeb et al., 2011). (b) Unrooted NJ tree based on pairwise  $F_{ST}$

1151 values overlaid with  $H_e$  values. The color of each population reflects the magnitude of

1152  $H_e$  values. Arrows show inferred directions of population expansion. (c) Visualization of

1153 genetic diversity and population connectivity. Populations connected by yellow lines are

1154 those with pairwise  $F_{ST} < 0.01$ . Detailed sampling locations and  $H_e$  values are given in

Supporting Information Table S6.

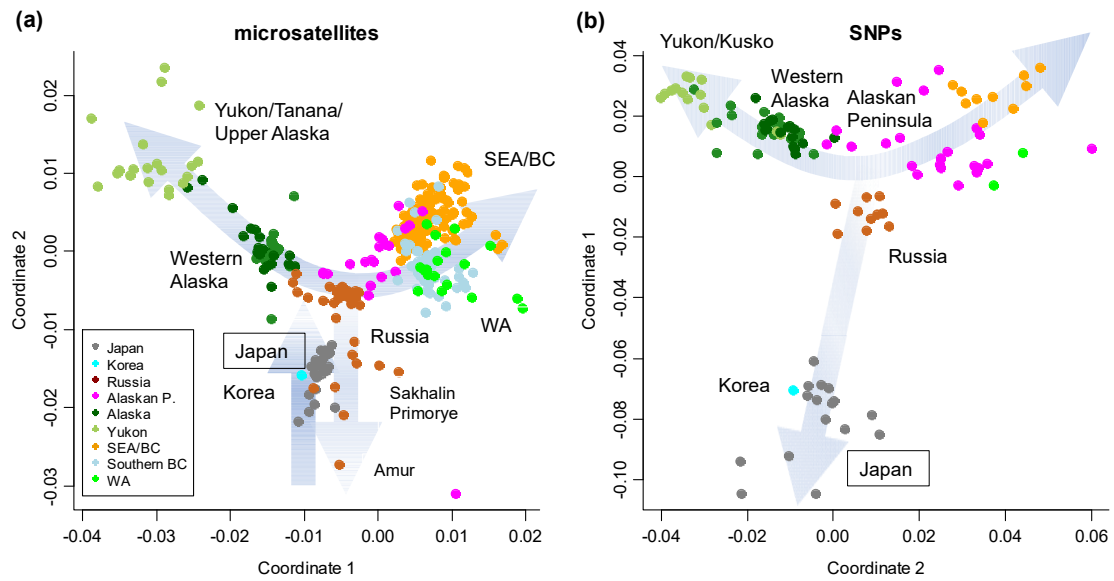

1155

1156

1157 **FIGURE 5** MDS analysis of the population structure of chum salmon in the distribution

1158 range based on pairwise  $F_{ST}$  values inferred from (a) 14 microsatellite loci of 381

1159 populations ( $n = 51,355$ ) (Beacham et al., 2009) and (b) 53 loci of 114 populations ( $n =$

10,458) (Seeb et al., 2011). Arrows show inferred directions of population expansion.

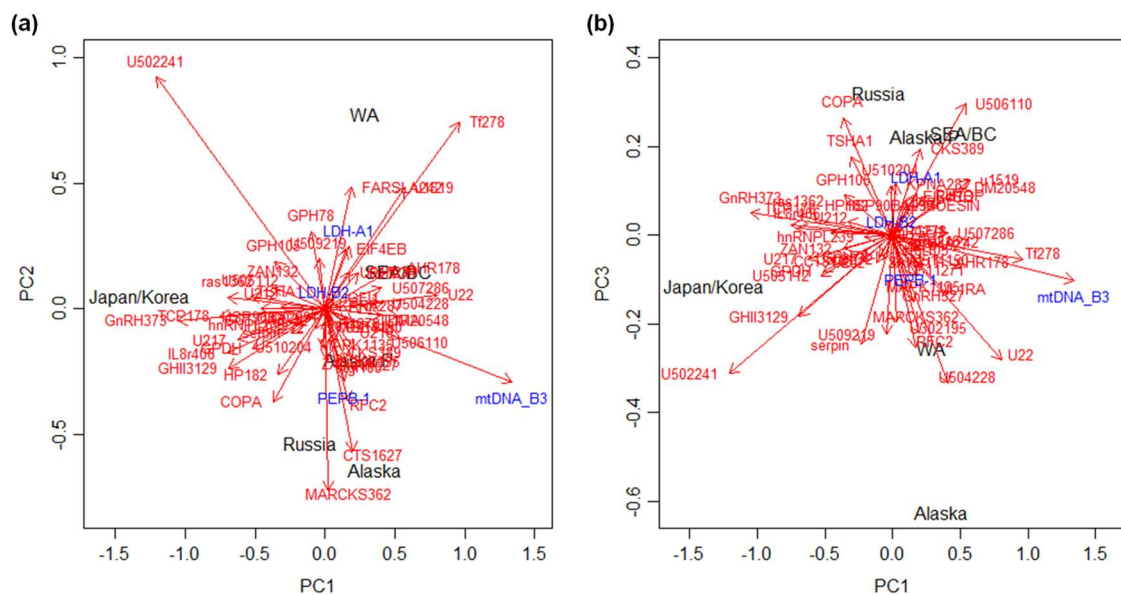

1160  
1161  
1162  
1163  
1164  
1165  
1166  
1167

**FIGURE 6** Principal component analysis biplots of SNP/isozyme allele and mtDNA haplotype frequencies. (a) PC1 vs. PC2; (b) PC1 vs. PC3. Cumulative proportions are as follows: 47% for PC1, 74% for PC2 and 88% for PC3. The analysis was based on 53 SNPs in 114 samples ( $n = 10,458$ ), three isozyme loci in 81 chum salmon populations ( $n = 14,550$ ), and mtDNA D-loop region haplotypes collected from 48 chum salmon populations ( $n = 2,162$ ) throughout the whole distribution range. Data are given in Supporting Information Tables S6–S9.

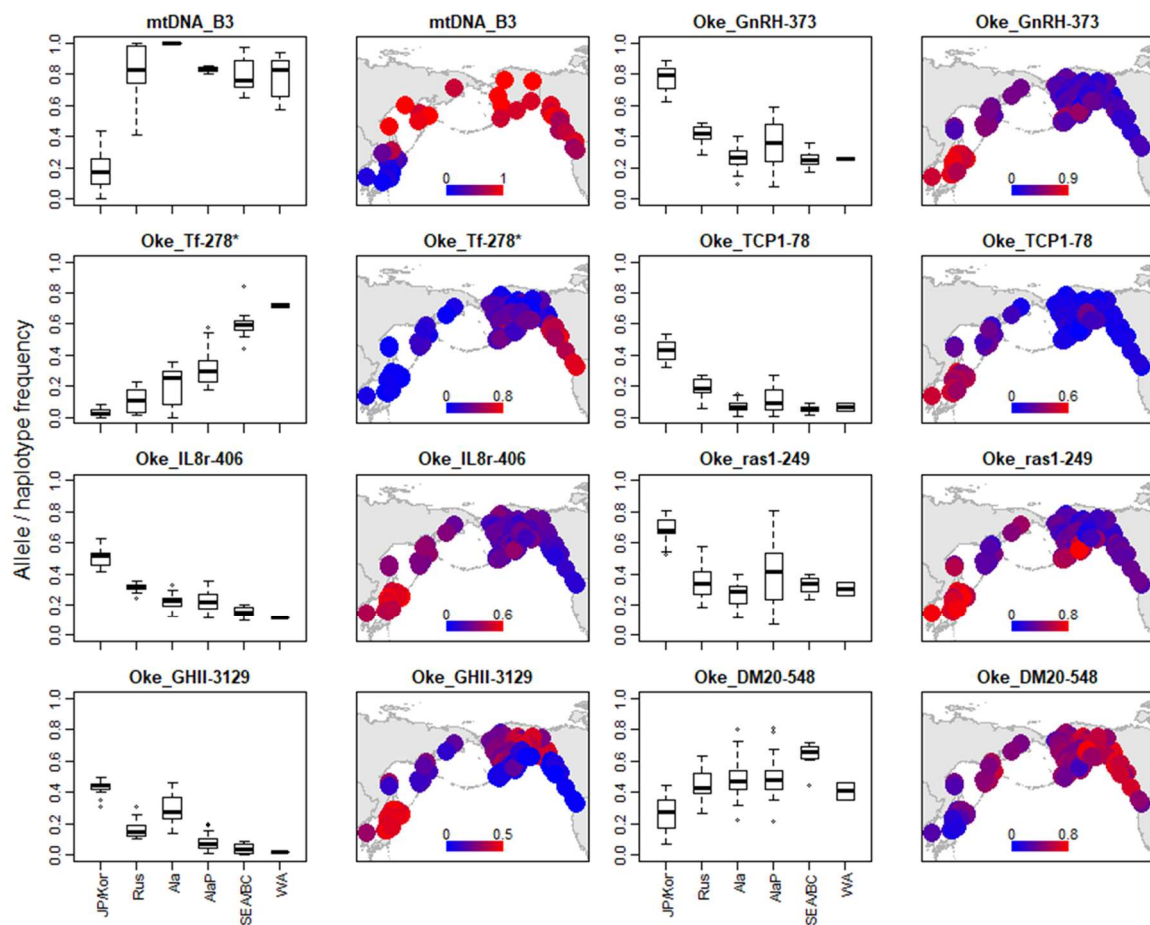

1168  
1169  
1170  
1171  
1172  
1173  
1174

**FIGURE 7** Geographical distribution of the top eight genes contributing to PC1 that differentiate Japanese and Korean chum salmon populations from other populations in the distribution range. Unknown SNPs were excluded. The plots are ordered according to the absolute eigenvectors of PC1, as shown in Supporting Information Figure S14 and Table S10.



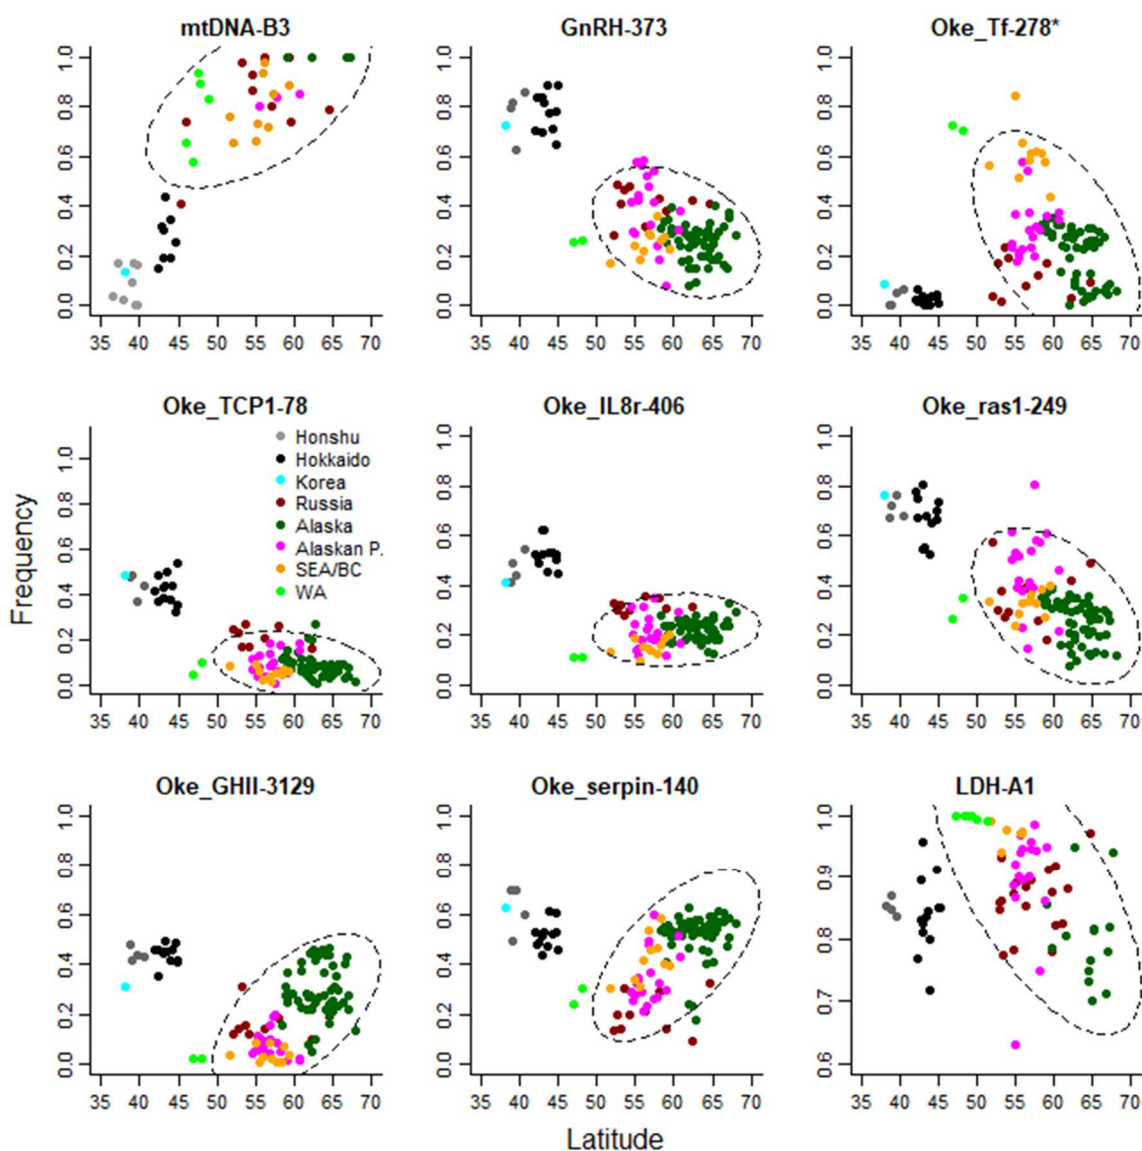

1175

1176

1177

1178 **FIGURE 8** Nine genes characterizing the distinctiveness of Japanese/Korean chum

1179 salmon. The dotted circles show 95% confidence ellipses for the latitudinal cline exhibited

1180 by American and Russian samples. Colors of points in the panels correspond to the

1181 sampling locations indicated in Supporting Information Figures S9, S11 and S12. Gene

functions and  $q$ -values for statistical tests are given in Table S10.
